# Supplementary material for: From phosphanylphosphaalkenes to coordination copper and silver polymers containing P–P bonds
Source: Royal Society of Chemistry journal article supplement (doi:10.1039/d4dt00987h), 2024-01-01
Supplement: d4dt00987h1.pdf [file d4dt00987h1.pdf]

# From phosphanylphosphaalkene to coordination copper and silver polymers containing P-P bond

Aleksandra Ziółkowska,<sup>a</sup> Marta Przeźniak-Welenc,<sup>b</sup> Tomasz Kruczyński,<sup>c</sup> Michael Gamer,<sup>d</sup>  
Łukasz Ponikiewski<sup>a\*</sup>

<sup>a</sup> Department of Inorganic Chemistry, Chemical Faculty, Gdansk University of Technology, Narutowicza Str. 11/12, 80-233 Gdansk, Poland;

<sup>b</sup> Institute of Nanotechnology and Materials Engineering, and Advanced Materials Centre, Gdansk University of Technology, Narutowicza Str. 11/12, 80-233 Gdansk, Poland;

<sup>c</sup> Department of Chemistry and Biochemistry, College of Science and Mathematics, Kennesaw State University, 1000 Chastain Road, Kennesaw, GA 30144, United States;

<sup>d</sup> Institute of Inorganic Chemistry, Karlsruhe Institute of Technology, Engesserstr. 15, 76131 Karlsruhe, Germany

|                                                                                                   |    |
|---------------------------------------------------------------------------------------------------|----|
| <b>PART A. NMR SPECTRA</b> .....                                                                  | 3  |
| B.1. Solution NMR .....                                                                           | 3  |
| B.1.1. Reaction of 1 with HO(CH <sub>2</sub> ) <sub>6</sub> OH.....                               | 3  |
| B.1.2. Reaction of 1 with HS(CH <sub>2</sub> ) <sub>4</sub> SH .....                              | 10 |
| B.1.3. Reaction of 1 with HSC <sub>6</sub> H <sub>4</sub> SH.....                                 | 17 |
| B.1.4. Reaction of 1 with HSCH <sub>2</sub> C <sub>6</sub> H <sub>4</sub> CH <sub>2</sub> SH..... | 22 |
| B.2. Solid state NMR .....                                                                        | 29 |
| B.2.1. Crystals of <i>rac</i> -poly_3a_Cu .....                                                   | 29 |
| B.2.2. Crystals of <i>meso</i> -poly_3a_Ag .....                                                  | 30 |
| B.2.3. Crystals of <i>rac</i> -poly_3c_Cu .....                                                   | 31 |
| B.2.4. Crystals of <i>rac</i> -poly_3c_Ag.....                                                    | 32 |
| <b>PART B. X-ray data</b> .....                                                                   | 33 |
| <b>PART C. TG and DSC spectra</b> .....                                                           | 38 |
| <b>PART D. References</b> .....                                                                   | 46 |

## PART A. NMR SPECTRA

All spectra in solution were recorded on Bruker AV400 MHz spectrometer (external standard tetramethylsilane for  $^1\text{H}$ ,  $^{13}\text{C}$ ; 85%  $\text{H}_3\text{PO}_4$  for  $^{31}\text{P}$ ).

### B.1. Solution NMR

#### B.1.1. Reaction of **1** with $\text{HO}(\text{CH}_2)_6\text{OH}$

##### B.1.1.2. Reaction progress of **1** with $\text{HO}(\text{CH}_2)_6\text{OH}$ .

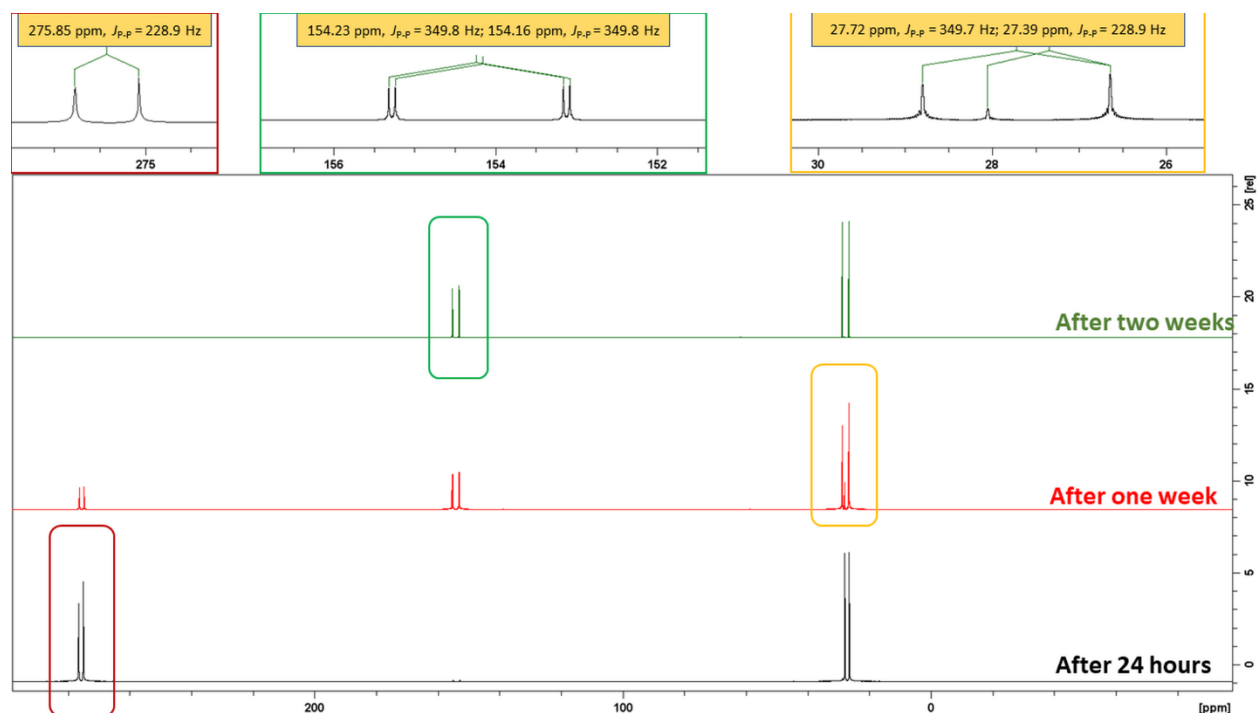

**Figure S1.**  $^{31}\text{P}\{^1\text{H}\}$  NMR (THF- $d_8$ , 400 MHz) spectra of reaction progress of **1** with  $\text{HO}(\text{CH}_2)_6\text{OH}$  conducted in THF- $d_8$ .

**B.1.1.1.** Spectra conducted from isolated solid residue of  $\{(\text{Ph})_2(\text{H})\text{C-P-P}t\text{Bu}_2\} \{\mu^2\text{-(O-(CH}_2)_6\text{-O)}\} \{t\text{Bu}_2\text{P-P-C(H)(Ph)}_2\}$  (**2**).

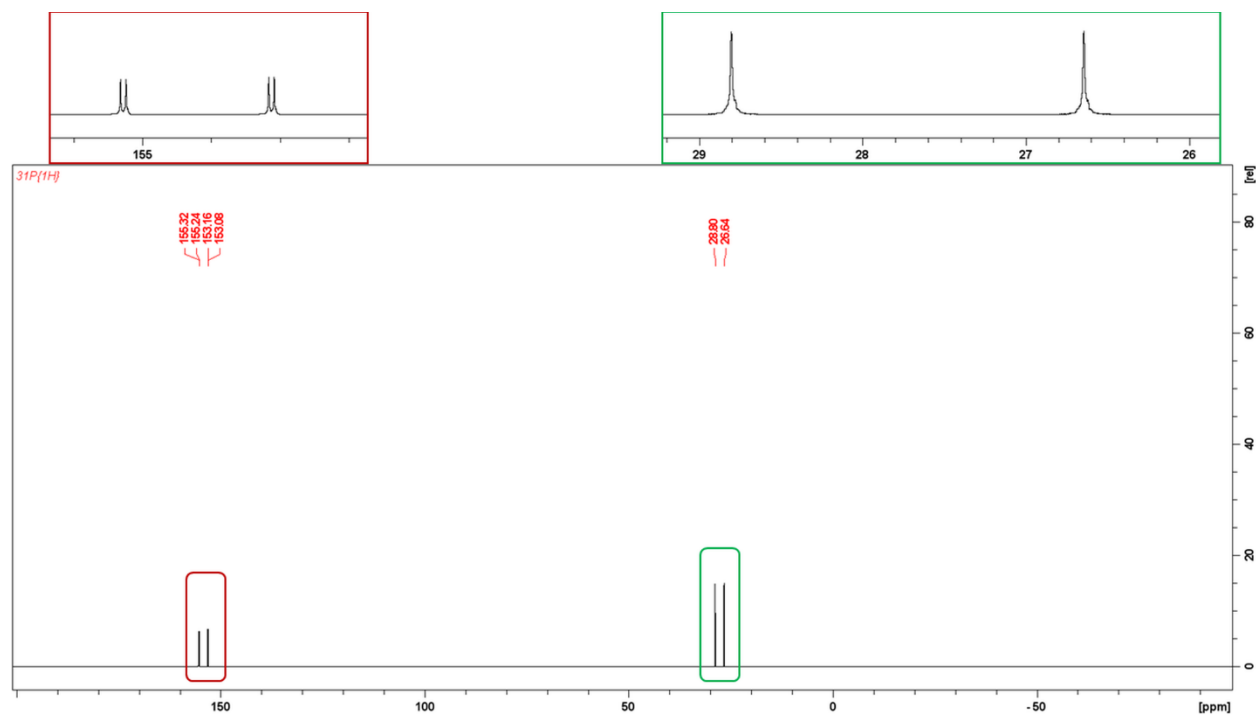

**Figure S2.**  $^{31}\text{P}\{^1\text{H}\}$  NMR (THF- $d_8$ , 400 MHz) spectrum of isolated with solid residue of  $\{(\text{Ph})_2(\text{H})\text{C-P-P}t\text{Bu}_2\} \{\mu^2\text{-(O-(CH}_2)_6\text{-O)}\} \{t\text{Bu}_2\text{P-P-C(H)(Ph)}_2\}$  (**2**).

Mixture of two diastereomers:

- 154.23 ppm,  $J_{\text{P-P}} = 349.8$  Hz,  $\{(\text{Ph})_2(\text{H})\text{C-P-P}t\text{Bu}_2\} \{\mu^2\text{-(O-(CH}_2)_6\text{-O)}\} \{t\text{Bu}_2\text{P-P-C(H)(Ph)}_2\}$ ;
- 154.16 ppm,  $J_{\text{P-P}} = 349.6$  Hz,  $\{(\text{Ph})_2(\text{H})\text{C-P-P}t\text{Bu}_2\} \{\mu^2\text{-(O-(CH}_2)_6\text{-O)}\} \{t\text{Bu}_2\text{P-P-C(H)(Ph)}_2\}$ ;
- 27.72 ppm,  $J_{\text{P-P}} = 349.7$  Hz,  $\{(\text{Ph})_2(\text{H})\text{C-P-P}t\text{Bu}_2\} \{\mu^2\text{-(O-(CH}_2)_6\text{-O)}\} \{t\text{Bu}_2\text{P-P-C(H)(Ph)}_2\}$ ;

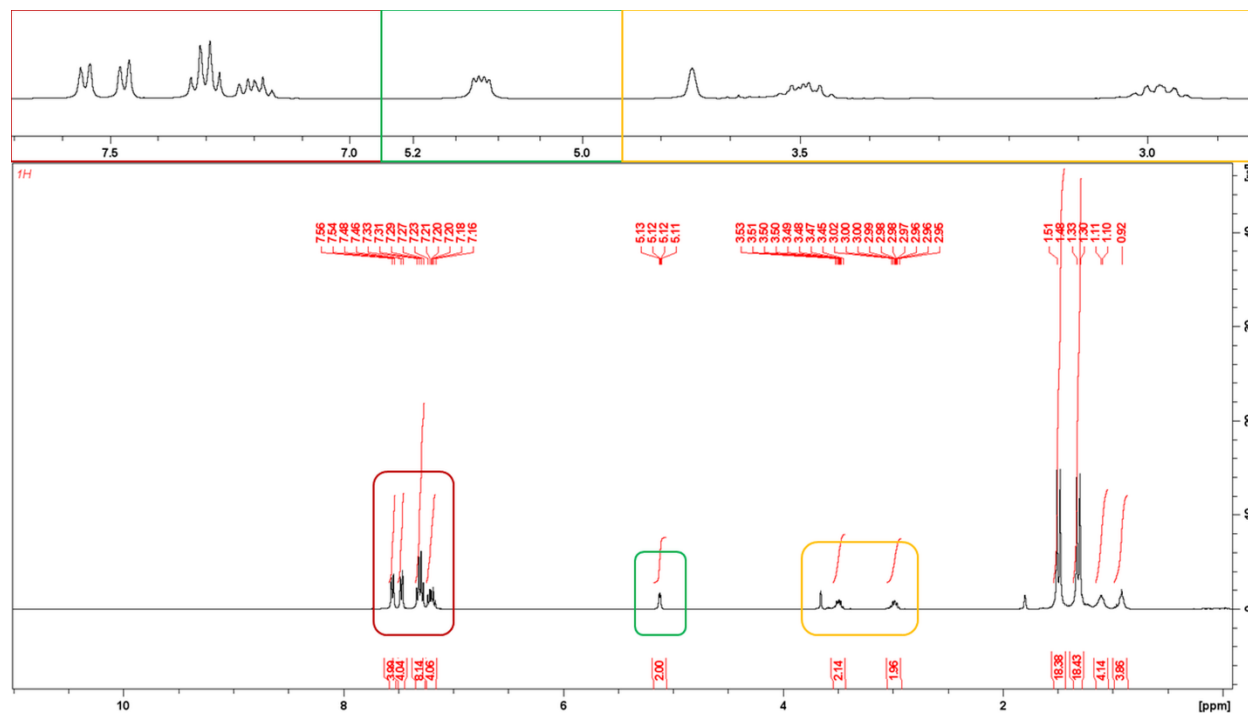

**Figure S3.**  $^1\text{H}$  NMR (THF- $d_8$ , 400 MHz) spectrum of isolated with solid residue of  $\{(\text{Ph})_2(\text{H})\text{C}-\text{P}-\text{PtBu}_2\} \{\mu^2-(\text{O}-(\text{CH}_2)_6-\text{O})\} \{t\text{Bu}_2\text{P}-\text{P}-\text{C}(\text{H})(\text{Ph})_2\}$  (**2**).

- 7.55 ppm, broad d, 4H,  $J_{\text{H-H}} = 8.1$  Hz,  $\{(\text{Ph})_2(\text{H})\text{C}-\text{P}-\text{PtBu}_2\} \{\mu^2-(\text{O}-(\text{CH}_2)_6-\text{O})\} \{t\text{Bu}_2\text{P}-\text{P}-\text{C}(\text{H})(\text{Ph})_2\}$ ;
- 7.47 ppm, broad d, 4H,  $J_{\text{H-H}} = 7.7$  Hz,  $\{(\text{Ph})_2(\text{H})\text{C}-\text{P}-\text{PtBu}_2\} \{\mu^2-(\text{O}-(\text{CH}_2)_6-\text{O})\} \{t\text{Bu}_2\text{P}-\text{P}-\text{C}(\text{H})(\text{Ph})_2\}$ ;
- 7.30 ppm, broad q, 8H,  $J_{\text{H-H}} = 16.0$  Hz,  $J_{\text{H-H}} = 7.7$  Hz,  $\{(\text{Ph})_2(\text{H})\text{C}-\text{P}-\text{PtBu}_2\} \{\mu^2-(\text{O}-(\text{CH}_2)_6-\text{O})\} \{t\text{Bu}_2\text{P}-\text{P}-\text{C}(\text{H})(\text{Ph})_2\}$ ;
- 7.20 ppm, broad m, 4H,  $\{(\text{Ph})_2(\text{H})\text{C}-\text{P}-\text{PtBu}_2\} \{\mu^2-(\text{O}-(\text{CH}_2)_6-\text{O})\} \{t\text{Bu}_2\text{P}-\text{P}-\text{C}(\text{H})(\text{Ph})_2\}$ ;
- 5.12 ppm, dd, 2H,  $J_{\text{H-H}} = 4.9$  Hz,  $J_{\text{H-H}} = 2.4$  Hz,  $\{(\text{Ph})_2(\text{H})\text{C}-\text{P}-\text{PtBu}_2\} \{\mu^2-(\text{O}-(\text{CH}_2)_6-\text{O})\} \{t\text{Bu}_2\text{P}-\text{P}-\text{C}(\text{H})(\text{Ph})_2\}$ ;
- 3.49 ppm, m, 2H,  $\{(\text{Ph})_2(\text{H})\text{C}-\text{P}-\text{PtBu}_2\} \{\mu^2-(\text{O}-(\text{CH}_2)_6-\text{O})\} \{t\text{Bu}_2\text{P}-\text{P}-\text{C}(\text{H})(\text{Ph})_2\}$ ;
- 2.98 ppm, m, 2H,  $\{(\text{Ph})_2(\text{H})\text{C}-\text{P}-\text{PtBu}_2\} \{\mu^2-(\text{O}-(\text{CH}_2)_6-\text{O})\} \{t\text{Bu}_2\text{P}-\text{P}-\text{C}(\text{H})(\text{Ph})_2\}$ ;
- 1.49 ppm, d, 18H,  $J_{\text{P-H}} = 11.4$  Hz,  $\{(\text{Ph})_2(\text{H})\text{C}-\text{P}-\text{PtBu}_2\} \{\mu^2-(\text{O}-(\text{CH}_2)_6-\text{O})\} \{t\text{Bu}_2\text{P}-\text{P}-\text{C}(\text{H})(\text{Ph})_2\}$ ;
- 1.31 ppm, d, 18H,  $J_{\text{P-H}} = 11.6$  Hz,  $\{(\text{Ph})_2(\text{H})\text{C}-\text{P}-\text{PtBu}_2\} \{\mu^2-(\text{O}-(\text{CH}_2)_6-\text{O})\} \{t\text{Bu}_2\text{P}-\text{P}-\text{C}(\text{H})(\text{Ph})_2\}$ ;
- 1.10 ppm, broad m, 4H,  $\{(\text{Ph})_2(\text{H})\text{C}-\text{P}-\text{PtBu}_2\} \{\mu^2-(\text{O}-(\text{CH}_2)_6-\text{O})\} \{t\text{Bu}_2\text{P}-\text{P}-\text{C}(\text{H})(\text{Ph})_2\}$ ;
- 0.92 ppm, broad m, 4H,  $\{(\text{Ph})_2(\text{H})\text{C}-\text{P}-\text{PtBu}_2\} \{\mu^2-(\text{O}-(\text{CH}_2)_6-\text{O})\} \{t\text{Bu}_2\text{P}-\text{P}-\text{C}(\text{H})(\text{Ph})_2\}$ ;

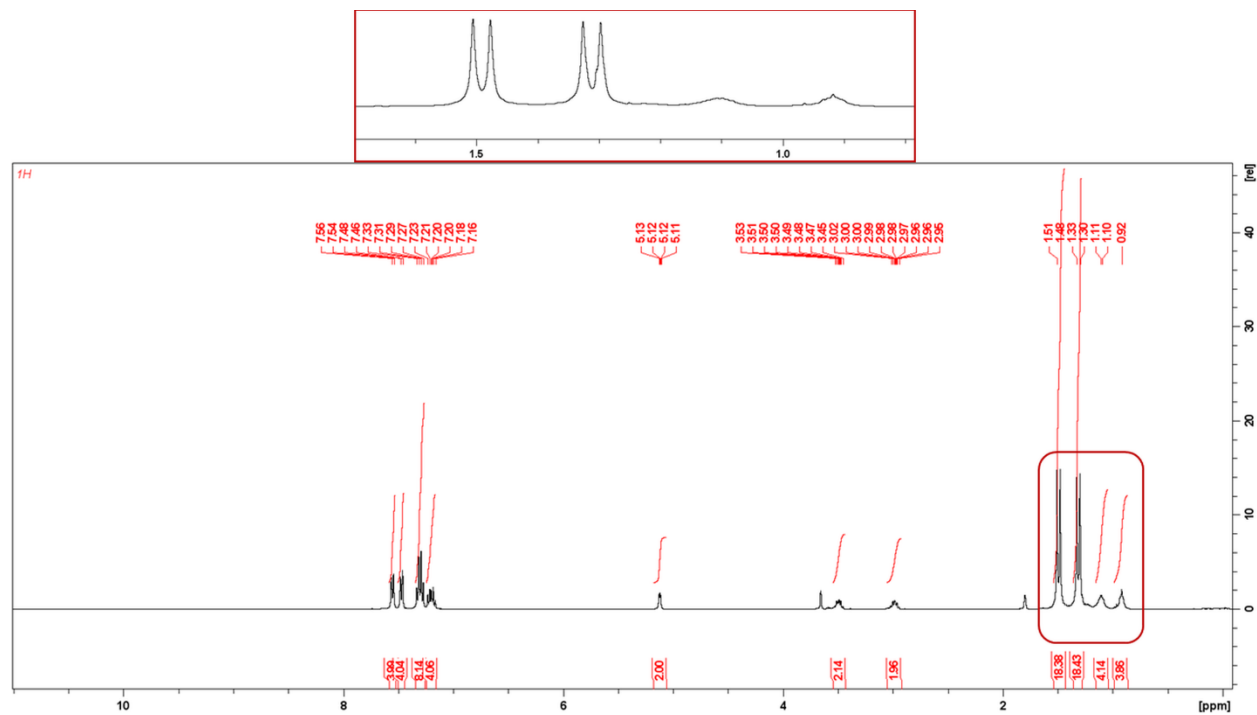

**Figure S4.**  $^1\text{H}$  NMR (THF- $d_8$ , 400 MHz) spectrum of isolated with solid residue of  $\{(\text{Ph})_2(\text{H})\text{C}-\text{P}-\text{P}t\text{Bu}_2\} \{\mu^2-(\text{O}-(\text{CH}_2)_6-\text{O})\} \{t\text{Bu}_2\text{P}-\text{P}-\text{C}(\text{H})(\text{Ph})_2\}$  (**2**).

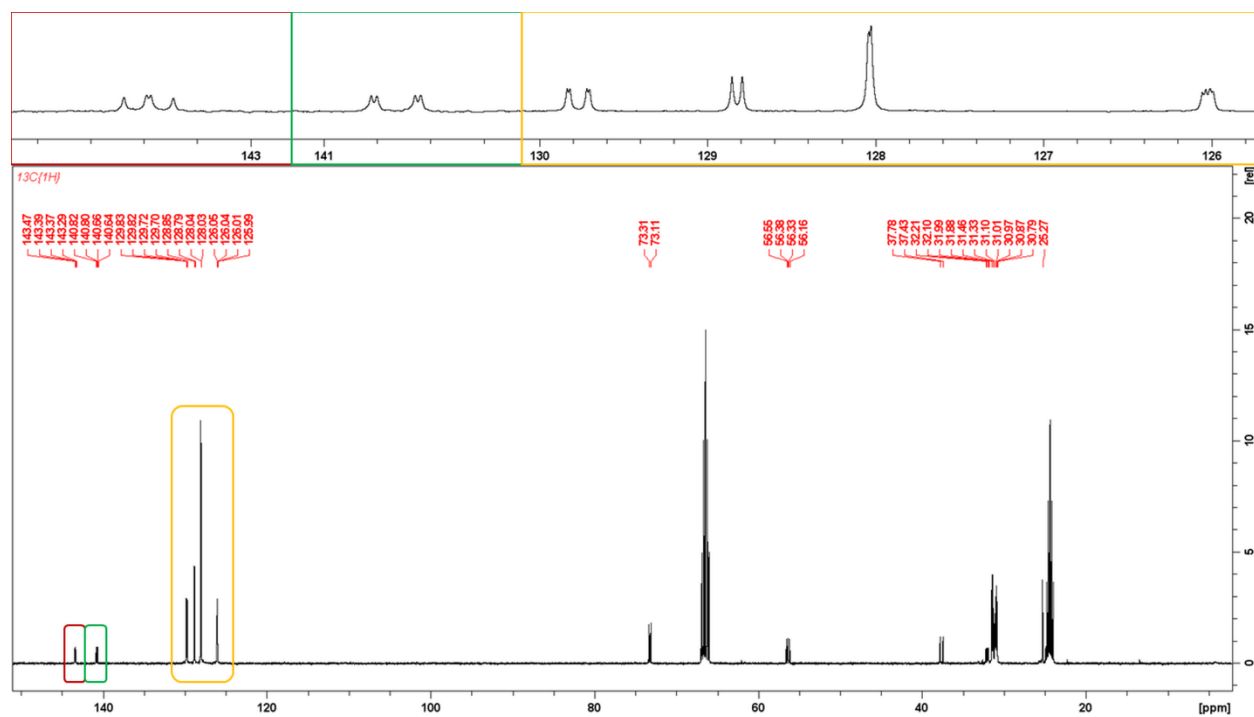

**Figure S5.**  $^{13}\text{C}\{^1\text{H}\}$  NMR (THF- $d_8$ , 400 MHz) spectrum of isolated with solid residue of  $\{(\text{Ph})_2(\text{H})\text{C}-\text{P}-\text{P}t\text{Bu}_2\} \{\mu^2-(\text{O}-(\text{CH}_2)_6-\text{O})\} \{t\text{Bu}_2\text{P}-\text{P}-\text{C}(\text{H})(\text{Ph})_2\}$  (**2**).

Aromatic carbon atoms:

- 143.38 ppm, dd,  $J_{\text{P-C}} = 10.1$  Hz,  $J_{\text{P-C}} = 8.5$  Hz;
- 140.73 ppm, dd,  $J_{\text{P-C}} = 16.5$  Hz,  $J_{\text{P-C}} = 2.1$  Hz;
- 129.76 ppm, dd,  $J_{\text{P-C}} = 11.7$  Hz,  $J_{\text{P-C}} = 1.6$  Hz;
- 128.82 ppm, d,  $J_{\text{P-C}} = 6.3$  Hz;
- 128.03 ppm, d,  $J_{\text{P-C}} = 1.4$  Hz;
- 126.02 ppm, dd,  $J_{\text{P-C}} = 4.4$  Hz,  $J_{\text{P-C}} = 2.0$  Hz;

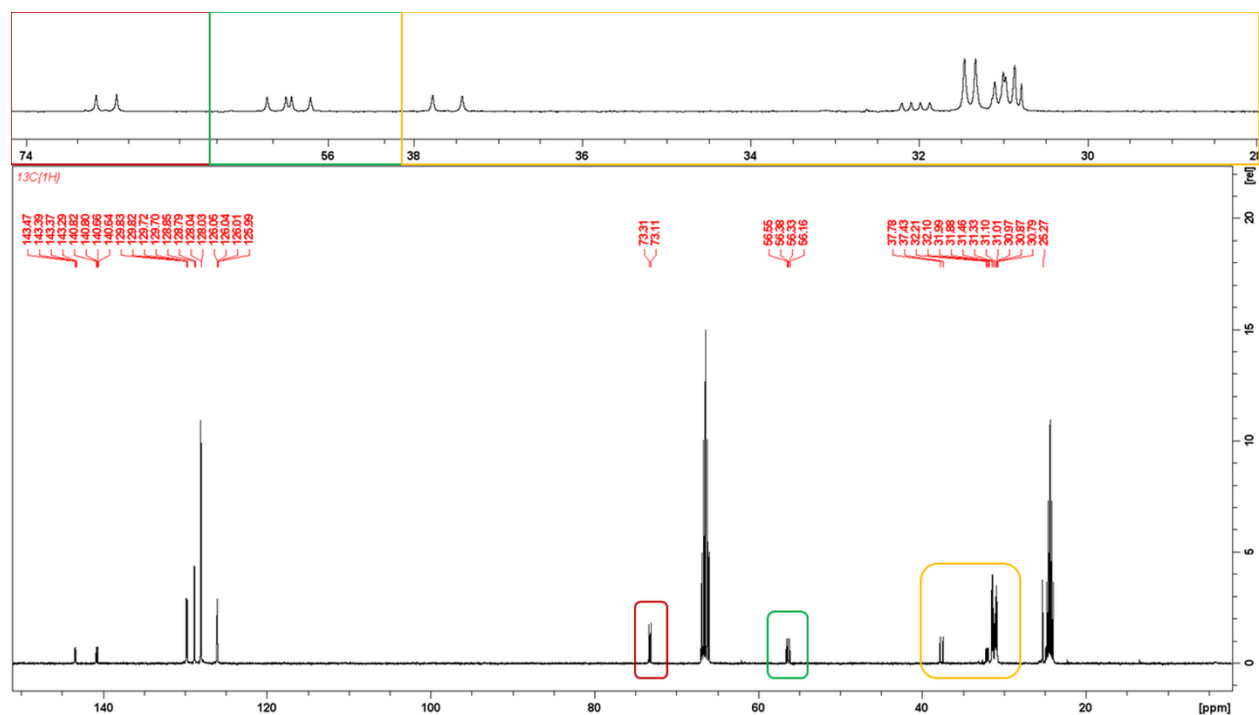

**Figure S6.**  $^{13}\text{C}\{^1\text{H}\}$  NMR (THF- $d_8$ , 400 MHz) spectrum of isolated with solid residue of  $\{(\text{Ph})_2(\text{H})\text{C}-\text{P}-\text{PtBu}_2\} \{\mu^2-(\text{O}-(\text{CH}_2)_6-\text{O})\} \{t\text{Bu}_2\text{P}-\text{P}-\text{C}(\text{H})(\text{Ph})_2\}$  (**2**).

- 73.21 ppm, d,  $J_{\text{P-C}} = 20.3$  Hz,  $\{(\text{Ph})_2(\text{H})\text{C}-\text{P}-\text{PtBu}_2\} \{\mu^2-(\text{O}-(\text{CH}_2)_6-\text{O})\} \{t\text{Bu}_2\text{P}-\text{P}-\text{C}(\text{H})(\text{Ph})_2\}$ ;
- 56.35 ppm, dd,  $J_{\text{P-C}} = 21.9$  Hz,  $J_{\text{P-C}} = 16.9$  Hz;  $\{(\text{Ph})_2(\text{H})\text{C}-\text{P}-\text{PtBu}_2\} \{\mu^2-(\text{O}-(\text{CH}_2)_6-\text{O})\} \{t\text{Bu}_2\text{P}-\text{P}-\text{C}(\text{H})(\text{Ph})_2\}$ ;
- 37.60 ppm, d,  $J_{\text{P-C}} = 35.3$  Hz,  $\{(\text{Ph})_2(\text{H})\text{C}-\text{P}-\text{P}\{\text{C}(\text{CH}_3)_3\}_2\} \{\mu^2-(\text{O}-(\text{CH}_2)_6-\text{O})\} \{\{(\text{H}_3\text{C})_3\text{C}\}_2\text{P}-\text{P}-\text{C}(\text{H})(\text{Ph})_2\}$ ;
- 32.04 ppm, dd,  $J_{\text{P-C}} = 22.2$  Hz,  $J_{\text{P-C}} = 11.3$  Hz,  $\{(\text{Ph})_2(\text{H})\text{C}-\text{P}-\text{P}\{\text{C}(\text{CH}_3)_3\}_2\} \{\mu^2-(\text{O}-(\text{CH}_2)_6-\text{O})\} \{\{(\text{H}_3\text{C})_3\text{C}\}_2\text{P}-\text{P}-\text{C}(\text{H})(\text{Ph})_2\}$ ;
- 31.40 ppm, d,  $J_{\text{P-C}} = 13.2$  Hz,  $\{(\text{Ph})_2(\text{H})\text{C}-\text{P}-\text{P}\{\text{C}(\text{CH}_3)_3\}_2\} \{\mu^2-(\text{O}-(\text{CH}_2)_6-\text{O})\} \{\{(\text{H}_3\text{C})_3\text{C}\}_2\text{P}-\text{P}-\text{C}(\text{H})(\text{Ph})_2\}$ ;
- 30.98 ppm, d,  $J_{\text{P-C}} = 10.2$  Hz,  $\{(\text{Ph})_2(\text{H})\text{C}-\text{P}-\text{P}\{\text{C}(\text{CH}_3)_3\}_2\} \{\mu^2-(\text{O}-(\text{CH}_2)_6-\text{O})\} \{\{(\text{H}_3\text{C})_3\text{C}\}_2\text{P}-\text{P}-\text{C}(\text{H})(\text{Ph})_2\}$ ;
- 30.83 ppm, d,  $J_{\text{P-C}} = 8.2$  Hz,  $\{(\text{Ph})_2(\text{H})\text{C}-\text{P}-\text{PtBu}_2\} \{\mu^2-(\text{O}-(\text{CH}_2)_6-\text{O})\} \{t\text{Bu}_2\text{P}-\text{P}-\text{C}(\text{H})(\text{Ph})_2\}$ ;
- 30.83 ppm, d,  $J_{\text{P-C}} = 8.2$  Hz,  $\{(\text{Ph})_2(\text{H})\text{C}-\text{P}-\text{PtBu}_2\} \{\mu^2-(\text{O}-(\text{CH}_2)_6-\text{O})\} \{t\text{Bu}_2\text{P}-\text{P}-\text{C}(\text{H})(\text{Ph})_2\}$ ;
- 25.27 ppm, s,  $\{(\text{Ph})_2(\text{H})\text{C}-\text{P}-\text{PtBu}_2\} \{\mu^2-(\text{O}-(\text{CH}_2)_6-\text{O})\} \{t\text{Bu}_2\text{P}-\text{P}-\text{C}(\text{H})(\text{Ph})_2\}$ ;



**B.1.1.3.** Spectra conducted from reaction mixture after reaction of **1** with HO(CH<sub>2</sub>)<sub>6</sub>OH in the presence of *t*BuOK as catalyst (10% molar).

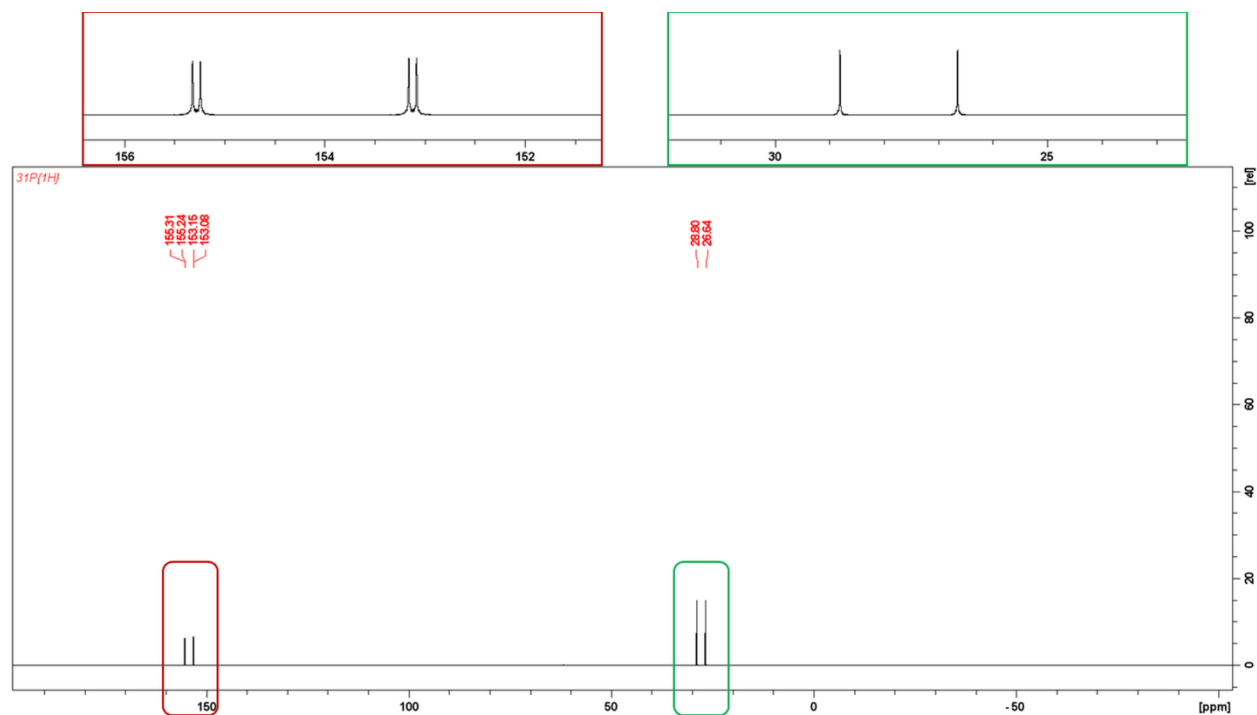

**Figure S7.** <sup>31</sup>P{<sup>1</sup>H} NMR (THF-d<sub>8</sub>, 400 MHz) spectra of reaction mixture of **1** with HO(CH<sub>2</sub>)<sub>6</sub>OH in the presence of *t*BuOK as catalyst (10% molar) conducted in THF-d<sub>8</sub>.

- 154.23 ppm,  $J_{P-P} = 349.8$  Hz,  $\{(\text{Ph})_2(\text{H})\text{C-P-P}t\text{Bu}_2\} \{\mu^2\text{-(O-(CH}_2)_6\text{-O)}\} \{t\text{Bu}_2\text{P-P-C(H)(Ph)}_2\}$ ;
- 154.16 ppm,  $J_{P-P} = 349.6$  Hz,  $\{(\text{Ph})_2(\text{H})\text{C-P-P}t\text{Bu}_2\} \{\mu^2\text{-(O-(CH}_2)_6\text{-O)}\} \{t\text{Bu}_2\text{P-P-C(H)(Ph)}_2\}$ ;
- 27.72 ppm,  $J_{P-P} = 349.7$  Hz,  $\{(\text{Ph})_2(\text{H})\text{C-P-P}t\text{Bu}_2\} \{\mu^2\text{-(O-(CH}_2)_6\text{-O)}\} \{t\text{Bu}_2\text{P-P-C(H)(Ph)}_2\}$ ;

### B.1.2. Reaction of 1 with HS(CH<sub>2</sub>)<sub>4</sub>SH

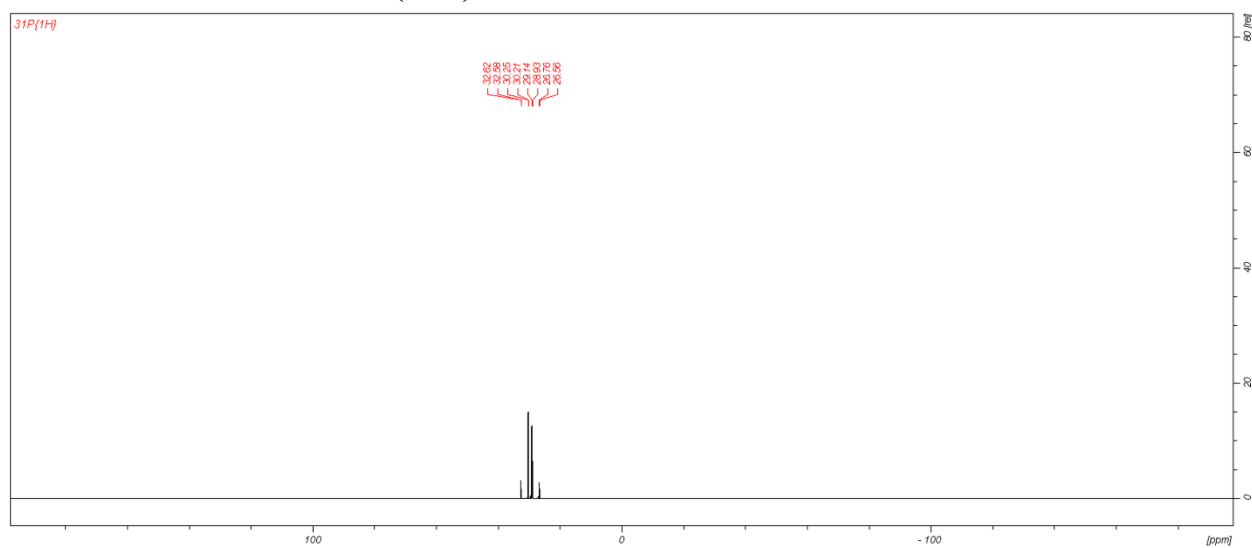

**Figure S8.** <sup>31</sup>P{<sup>1</sup>H} NMR (C<sub>6</sub>D<sub>6</sub>, 162 MHz) spectrum of isolated crystals of {(Ph)<sub>2</sub>(H)C-P-P*t*Bu<sub>2</sub>} {μ<sup>2</sup>-(S-(CH<sub>2</sub>)<sub>4</sub>-S)} {*t*Bu<sub>2</sub>P-P-C(H)(Ph)<sub>2</sub>} (**3a**).

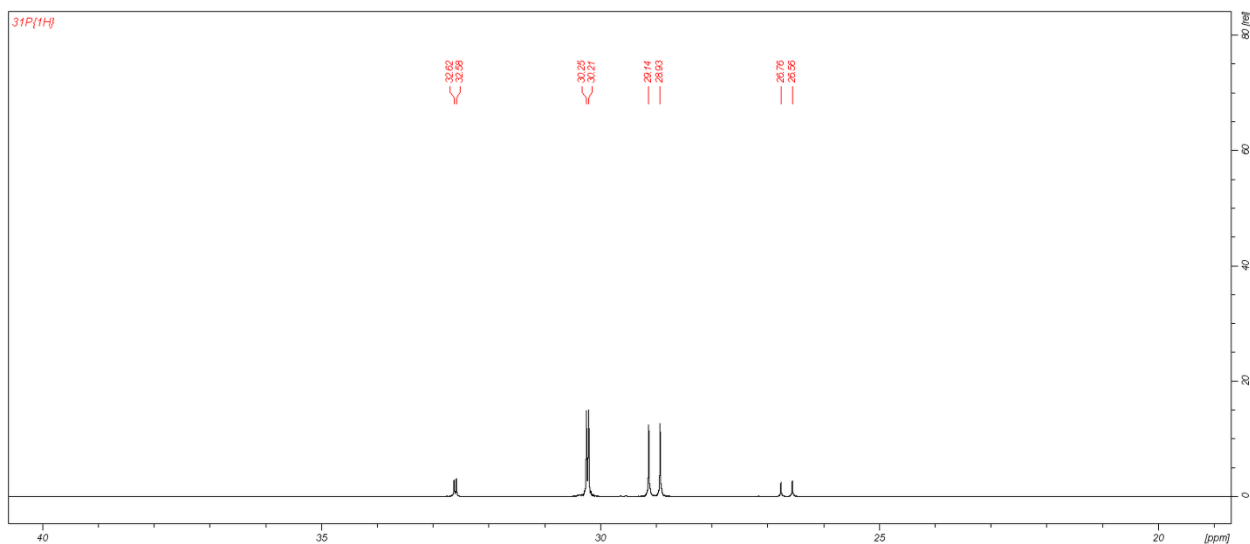

**Figure S9.**  $^{31}\text{P}\{^1\text{H}\}$  NMR ( $\text{C}_6\text{D}_6$ , 162 MHz) spectrum of isolated crystals of  $\{(\text{Ph})_2(\text{H})\text{C-P-}t\text{Bu}_2\}\{\mu^2\text{-(S-(CH}_2)_4\text{-S)}\}\{t\text{Bu}_2\text{P-P-C(H)(Ph)}_2\}$  (**3a**) in narrow range from 40 ppm to 20 ppm.

Mixture of two diastereomers:

- 31.44 ppm, d,  $J_{\text{P-P}} = 384.2$  Hz,  $\{(\text{Ph})_2(\text{H})\text{C-P-}t\text{Bu}_2\}\{\mu^2\text{-(S-(CH}_2)_4\text{-S)}\}\{t\text{Bu}_2\text{P-P-C(H)(Ph)}_2\}$ ;
- 27.75 ppm, d,  $J_{\text{P-P}} = 384.2$  Hz,  $\{(\text{Ph})_2(\text{H})\text{C-P-}t\text{Bu}_2\}\{\mu^2\text{-(S-(CH}_2)_4\text{-S)}\}\{t\text{Bu}_2\text{P-P-C(H)(Ph)}_2\}$ ;
- 31.40 ppm, d,  $J_{\text{P-P}} = 384.2$  Hz,  $\{(\text{Ph})_2(\text{H})\text{C-P-}t\text{Bu}_2\}\{\mu^2\text{-(S-(CH}_2)_4\text{-S)}\}\{t\text{Bu}_2\text{P-P-C(H)(Ph)}_2\}$ ;
- 27.95 ppm, d,  $J_{\text{P-P}} = 384.2$  Hz,  $\{(\text{Ph})_2(\text{H})\text{C-P-}t\text{Bu}_2\}\{\mu^2\text{-(S-(CH}_2)_4\text{-S)}\}\{t\text{Bu}_2\text{P-P-C(H)(Ph)}_2\}$ ;

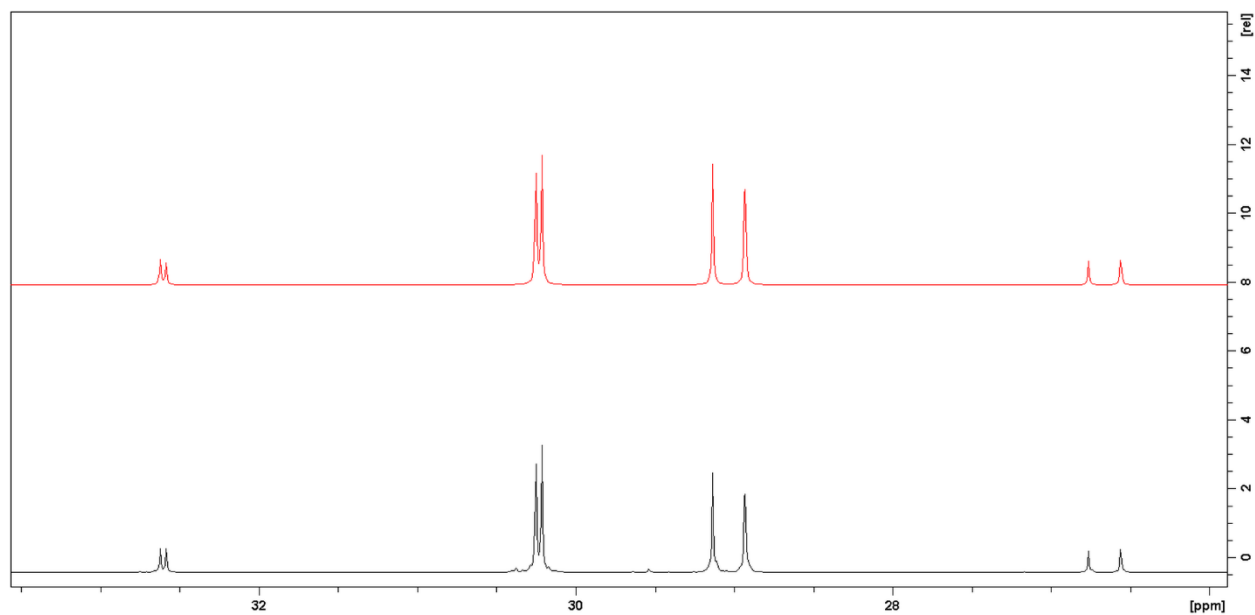

**Figure S10.**  $^{31}\text{P}\{^1\text{H}\}$  NMR ( $\text{C}_6\text{D}_6$ , 162 MHz) spectrum of isolated crystals of **3a** – black color;

$^{31}\text{P}\{^1\text{H}\}$  NMR simulation spectrum of **3a** – red color;

Mixture of two diastereomers; Simulation parameters:

Statistical weight: 1.0000

- 30.96 ppm, d,  $J_{\text{P-P}} = 384.1$  Hz;
- 28.18 ppm, d,  $J_{\text{P-P}} = 384.1$  Hz;

Statistical weight: 0.9987

- 30.97 ppm, d,  $J_{\text{P-P}} = 384.2$  Hz;
- 28.41 ppm, d,  $J_{\text{P-P}} = 384.2$  Hz;

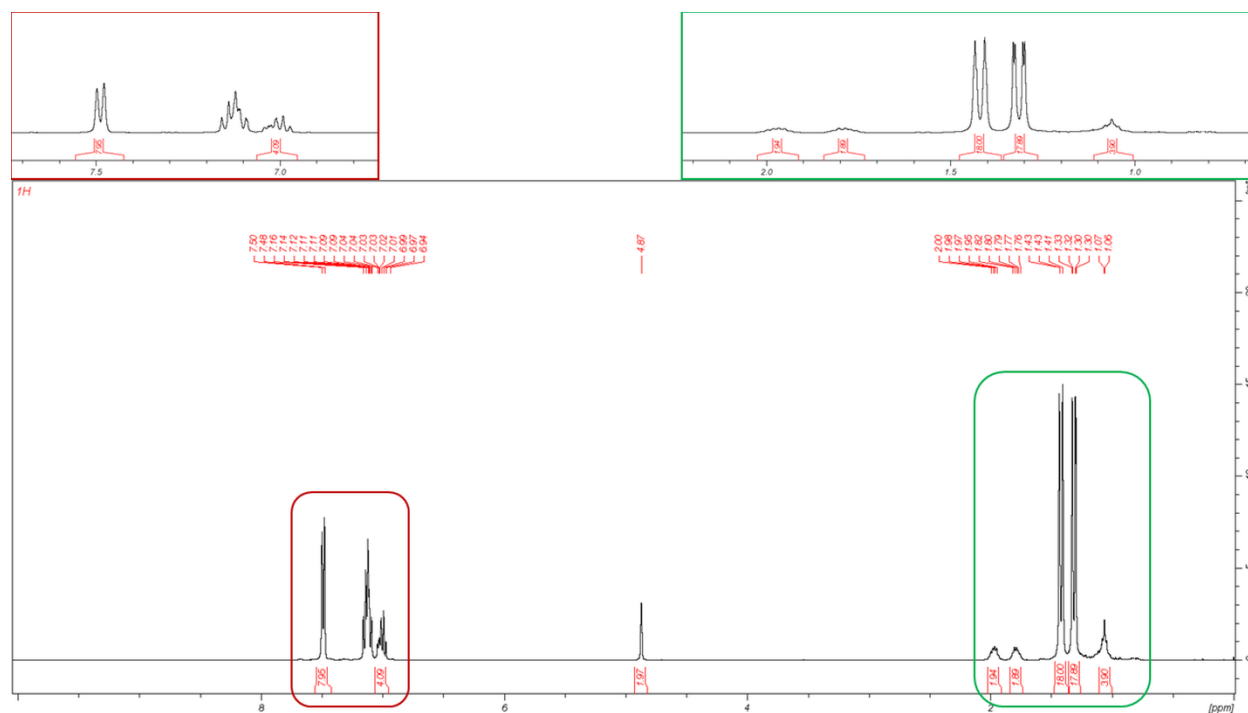

**Figure S11.** <sup>1</sup>H NMR (C<sub>6</sub>D<sub>6</sub>, 400 MHz) spectrum of isolated crystals of  $\{(\text{Ph})_2(\text{H})\text{C-P-P}t\text{Bu}_2\} \{\mu^2\text{-(S-(CH}_2)_4\text{-S)}\} \{t\text{Bu}_2\text{P-P-C(H)(Ph)}_2\}$  (**3a**).

- 7.50 – 6.94 ppm, aromatic protons, 20H,  $\{(\text{Ph})_2(\text{H})\text{C-P-P}t\text{Bu}_2\} \{\mu^2\text{-(S-(CH}_2)_4\text{-S)}\} \{t\text{Bu}_2\text{P-P-C(H)(Ph)}_2\}$ ;
- 4.87 ppm, s, 2H,  $\{(\text{Ph})_2(\text{H})\text{C-P-P}t\text{Bu}_2\} \{\mu^2\text{-(S-(CH}_2)_4\text{-S)}\} \{t\text{Bu}_2\text{P-P-C(H)(Ph)}_2\}$ ;
- 1.97 ppm, broad m, 2H,  $\{(\text{Ph})_2(\text{H})\text{C-P-P}t\text{Bu}_2\} \{\mu^2\text{-(S-(CH}_2)_4\text{-S)}\} \{t\text{Bu}_2\text{P-P-C(H)(Ph)}_2\}$ ;
- 1.79 ppm, broad m, 2H,  $\{(\text{Ph})_2(\text{H})\text{C-P-P}t\text{Bu}_2\} \{\mu^2\text{-(S-(CH}_2)_4\text{-S)}\} \{t\text{Bu}_2\text{P-P-C(H)(Ph)}_2\}$ ;
- 1.42 ppm, broad d,  $J_{\text{P-H}} = 10.5$  Hz, 18H,  $\{(\text{Ph})_2(\text{H})\text{C-P-P}t\text{Bu}_2\} \{\mu^2\text{-(S-(CH}_2)_4\text{-S)}\} \{t\text{Bu}_2\text{P-P-C(H)(Ph)}_2\}$ ;
- 1.31 ppm, dd,  $J_{\text{P-H}} = 10.44$  Hz,  $J_{\text{P-H}} = 2.1$  Hz, 18H,  $\{(\text{Ph})_2(\text{H})\text{C-P-P}t\text{Bu}_2\} \{\mu^2\text{-(S-(CH}_2)_4\text{-S)}\} \{t\text{Bu}_2\text{P-P-C(H)(Ph)}_2\}$ ;
- 1.07 ppm, broad m, 4H,  $\{(\text{Ph})_2(\text{H})\text{C-P-P}t\text{Bu}_2\} \{\mu^2\text{-(S-(CH}_2)_4\text{-S)}\} \{t\text{Bu}_2\text{P-P-C(H)(Ph)}_2\}$ ;

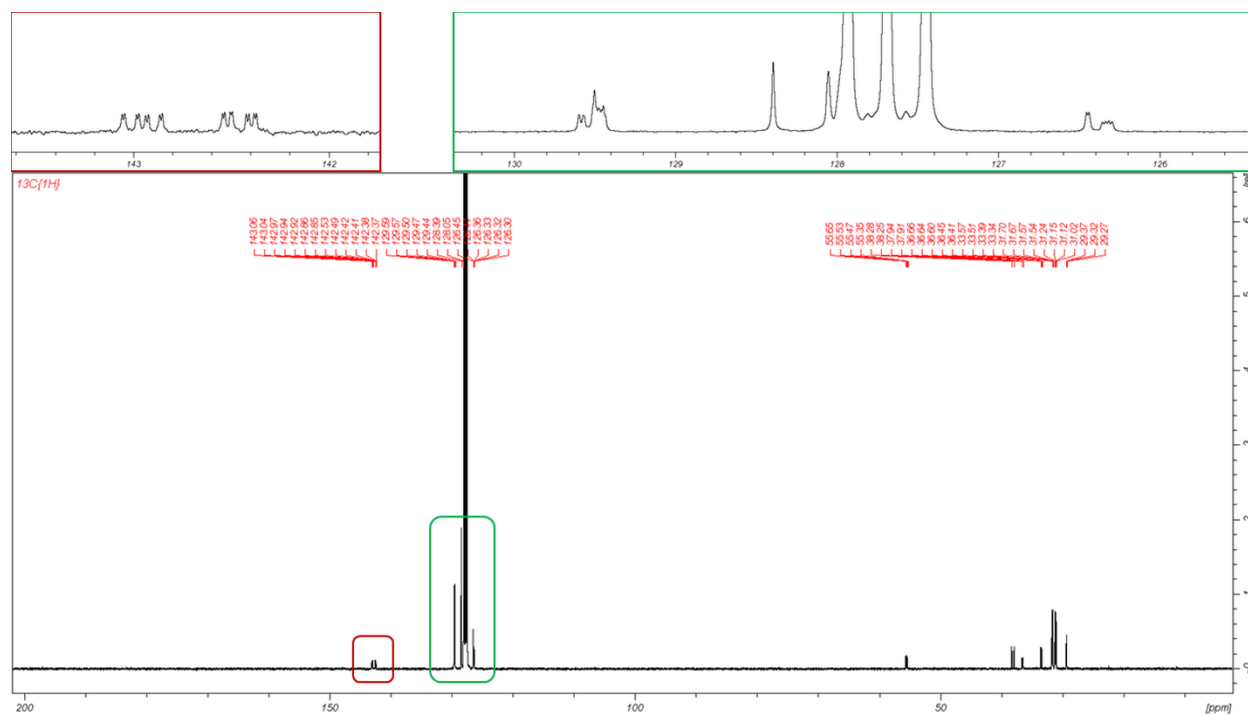

**Figure S12.**  $^{13}\text{C}\{^1\text{H}\}$  NMR ( $\text{C}_6\text{D}_6$ , 100.62 MHz) spectrum of isolated crystals of  $\{(\text{Ph})_2(\text{H})\text{C}-\text{P}-\text{PtBu}_2\}\{\mu^2\text{-(S-(CH}_2)_4\text{-S)}\}\{t\text{Bu}_2\text{P-P-C(H)(Ph)}_2\}$  (**3a**).

Aromatic carbon atoms:

- 142.95 ppm, ddd,  $J_{\text{P-C}} = 12.1$  Hz,  $J_{\text{P-C}} = 7.3$  Hz,  $J_{\text{P-C}} = 1.3$  Hz;
- 142.46 ppm, ddd,  $J_{\text{P-C}} = 12.4$  Hz,  $J_{\text{P-C}} = 3.8$  Hz,  $J_{\text{P-C}} = 1.2$  Hz;
- 129.58 ppm, d,  $J_{\text{P-C}} = 2.7$  Hz;
- 129.50 ppm, s;
- 129.46 ppm, d,  $J_{\text{P-C}} = 2.8$  Hz;
- 128.39 ppm, s;
- 128.05 ppm, s;
- 126.45 ppm, d,  $J_{\text{P-C}} = 1.7$  Hz;
- 126.33 ppm, dd,  $J_{\text{P-C}} = 4.2$  Hz,  $J_{\text{P-C}} = 2.1$  Hz;

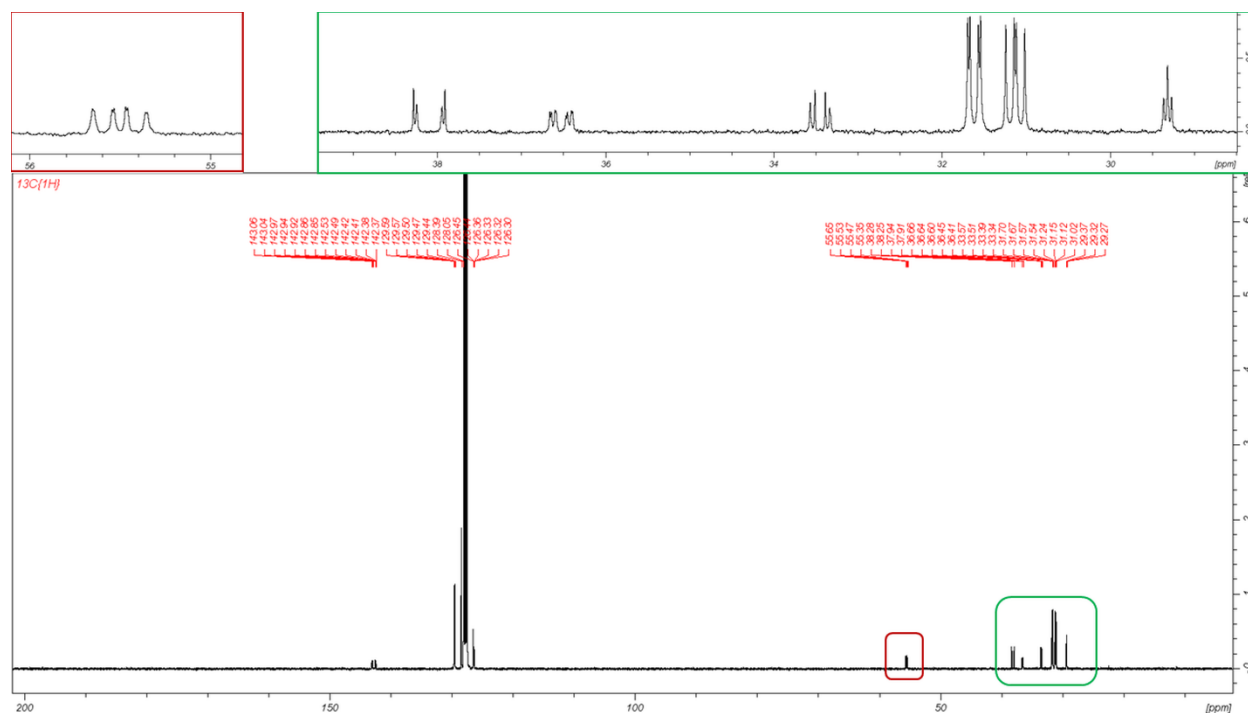

**Figure S13.**  $^{13}\text{C}\{^1\text{H}\}$  NMR ( $\text{C}_6\text{D}_6$ , 100.62 MHz) spectrum of isolated crystals of  $\{(\text{Ph})_2(\text{H})\text{C}-\text{P}-\text{PtBu}_2\} \{\mu^2-(\text{S}-(\text{CH}_2)_4-\text{S})\} \{t\text{Bu}_2\text{P}-\text{P}-\text{C}(\text{H})(\text{Ph})_2\}$  (**3a**).

- 55.50 ppm, ddd,  $J_{\text{P-C}} = 18.6$  Hz,  $J_{\text{P-C}} = 11.0$  Hz,  $J_{\text{P-C}} = 1.1$  Hz,  $\{(\text{Ph})_2(\text{H})\text{C}-\text{P}-\text{P}\{\text{C}(\text{CH}_3)_3\}_2\} \{\mu^2-(\text{S}-(\text{CH}_2)_4-\text{S})\} \{t\text{Bu}_2\text{P}-\text{P}-\text{C}(\text{H})(\text{Ph})_2\}$ ;
- 38.10 ppm, dd,  $J_{\text{P-C}} = 34.1$  Hz,  $J_{\text{P-C}} = 3.5$  Hz,  $\{(\text{Ph})_2(\text{H})\text{C}-\text{P}-\text{P}\{\text{C}(\text{CH}_3)_3\}_2\} \{\mu^2-(\text{S}-(\text{CH}_2)_4-\text{S})\} \{t\text{Bu}_2\text{P}-\text{P}-\text{C}(\text{H})(\text{Ph})_2\}$ ;
- 36.53 ppm, ddd,  $J_{\text{P-C}} = 19.2$  Hz,  $J_{\text{P-C}} = 6.1$  Hz,  $J_{\text{P-C}} = 1.9$  Hz,  $\{(\text{Ph})_2(\text{H})\text{C}-\text{P}-\text{P}\{\text{C}(\text{CH}_3)_3\}_2\} \{\mu^2-(\text{S}-(\text{CH}_2)_4-\text{S})\} \{t\text{Bu}_2\text{P}-\text{P}-\text{C}(\text{H})(\text{Ph})_2\}$ ;
- 33.45 ppm, dd,  $J_{\text{P-C}} = 18.2$  Hz,  $J_{\text{P-C}} = 5.7$  Hz,  $\{(\text{Ph})_2(\text{H})\text{C}-\text{P}-\text{P}\{\text{C}(\text{CH}_3)_3\}_2\} \{\mu^2-(\text{S}-(\text{CH}_2)_4-\text{S})\} \{t\text{Bu}_2\text{P}-\text{P}-\text{C}(\text{H})(\text{Ph})_2\}$ ;
- 31.62 ppm, dd,  $J_{\text{P-C}} = 12.6$  Hz,  $J_{\text{P-C}} = 2.7$  Hz,  $\{(\text{Ph})_2(\text{H})\text{C}-\text{P}-\text{P}\{\text{C}(\text{CH}_3)_3\}_2\} \{\mu^2-(\text{S}-(\text{CH}_2)_4-\text{S})\} \{t\text{Bu}_2\text{P}-\text{P}-\text{C}(\text{H})(\text{Ph})_2\}$ ;
- 31.13 ppm, dd,  $J_{\text{P-C}} = 12.8$  Hz,  $J_{\text{P-C}} = 9.9$  Hz,  $\{(\text{Ph})_2(\text{H})\text{C}-\text{P}-\text{P}\{\text{C}(\text{CH}_3)_3\}_2\} \{\mu^2-(\text{S}-(\text{CH}_2)_4-\text{S})\} \{t\text{Bu}_2\text{P}-\text{P}-\text{C}(\text{H})(\text{Ph})_2\}$ ;
- 29.35 ppm, t,  $J_{\text{P-C}} = 5.0$  Hz,  $\{(\text{Ph})_2(\text{H})\text{C}-\text{P}-\text{PtBu}_2\} \{\mu^2-(\text{S}-(\text{CH}_2)_4-\text{S})\} \{t\text{Bu}_2\text{P}-\text{P}-\text{C}(\text{H})(\text{Ph})_2\}$ ;

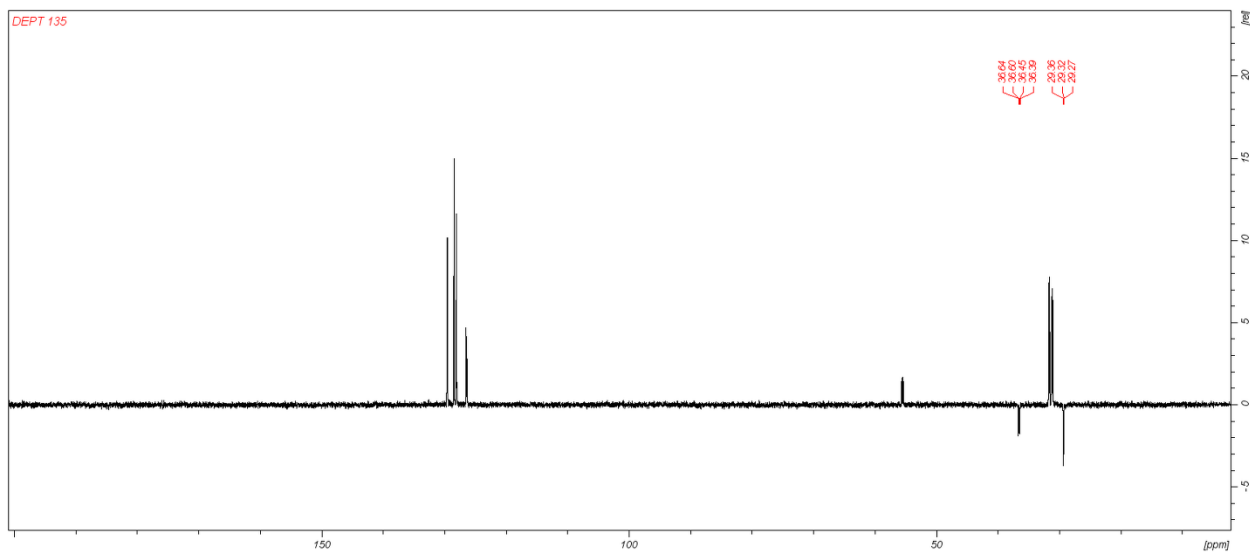

**Figure S14.**  $^{13}\text{C}\{^1\text{H}\}$  NMR-dept135 ( $\text{C}_6\text{D}_6$ , 100.62 MHz) spectrum of isolated crystals of  $\{(\text{Ph})_2(\text{H})\text{C}-\text{P}-\text{P}t\text{Bu}_2\} \{\mu^2-(\text{S}-(\text{CH}_2)_4-\text{S})\} \{t\text{Bu}_2\text{P}-\text{P}-\text{C}(\text{H})(\text{Ph})_2\}$  (**3a**).



### B.1.3. Reaction of 1 with HSC<sub>6</sub>H<sub>4</sub>SH

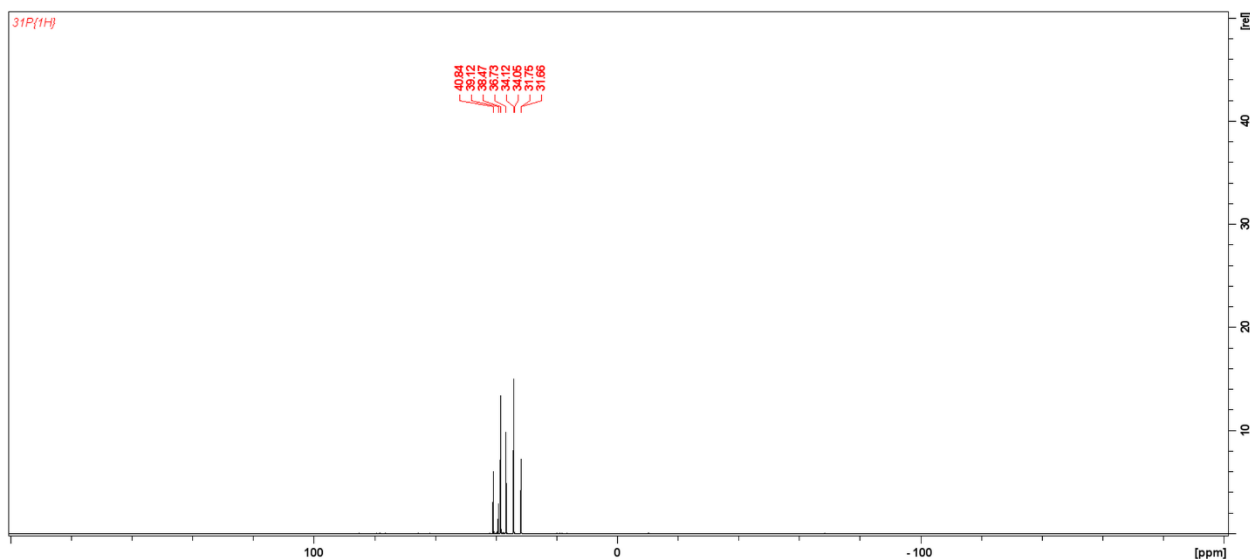

**Figure S15.**  $^{31}\text{P}\{^1\text{H}\}$  NMR (THF- $d_8$ , 162 MHz) spectrum of isolated white precipitate of  $\{(\text{Ph})_2(\text{H})\text{C}-\text{P}-\text{P}t\text{Bu}_2\} \{\mu^2-(\text{S}-\text{C}_6\text{H}_4-\text{S})\} \{t\text{Bu}_2\text{P}-\text{P}-\text{C}(\text{H})(\text{Ph})_2\}$  (**3b**).

Mixture of two diastereomers:

- 39.66 ppm, d,  $J_{\text{P-P}} = 384.4$  Hz,  $\{(\text{Ph})_2(\text{H})\text{C}-\text{P}-\text{P}t\text{Bu}_2\} \{\mu^2-(\text{S}-\text{C}_6\text{H}_4-\text{S})\} \{t\text{Bu}_2\text{P}-\text{P}-\text{C}(\text{H})(\text{Ph})_2\}$ ;
- 32.94 ppm, d,  $J_{\text{P-P}} = 384.4$  Hz,  $\{(\text{Ph})_2(\text{H})\text{C}-\text{P}-\text{P}t\text{Bu}_2\} \{\mu^2-(\text{S}-\text{C}_6\text{H}_4-\text{S})\} \{t\text{Bu}_2\text{P}-\text{P}-\text{C}(\text{H})(\text{Ph})_2\}$ ;
- 37.93 ppm, d,  $J_{\text{P-P}} = 387.3$  Hz,  $\{(\text{Ph})_2(\text{H})\text{C}-\text{P}-\text{P}t\text{Bu}_2\} \{\mu^2-(\text{S}-\text{C}_6\text{H}_4-\text{S})\} \{t\text{Bu}_2\text{P}-\text{P}-\text{C}(\text{H})(\text{Ph})_2\}$ ;
- 32.86 ppm, d,  $J_{\text{P-P}} = 387.3$  Hz,  $\{(\text{Ph})_2(\text{H})\text{C}-\text{P}-\text{P}t\text{Bu}_2\} \{\mu^2-(\text{S}-\text{C}_6\text{H}_4-\text{S})\} \{t\text{Bu}_2\text{P}-\text{P}-\text{C}(\text{H})(\text{Ph})_2\}$ ;

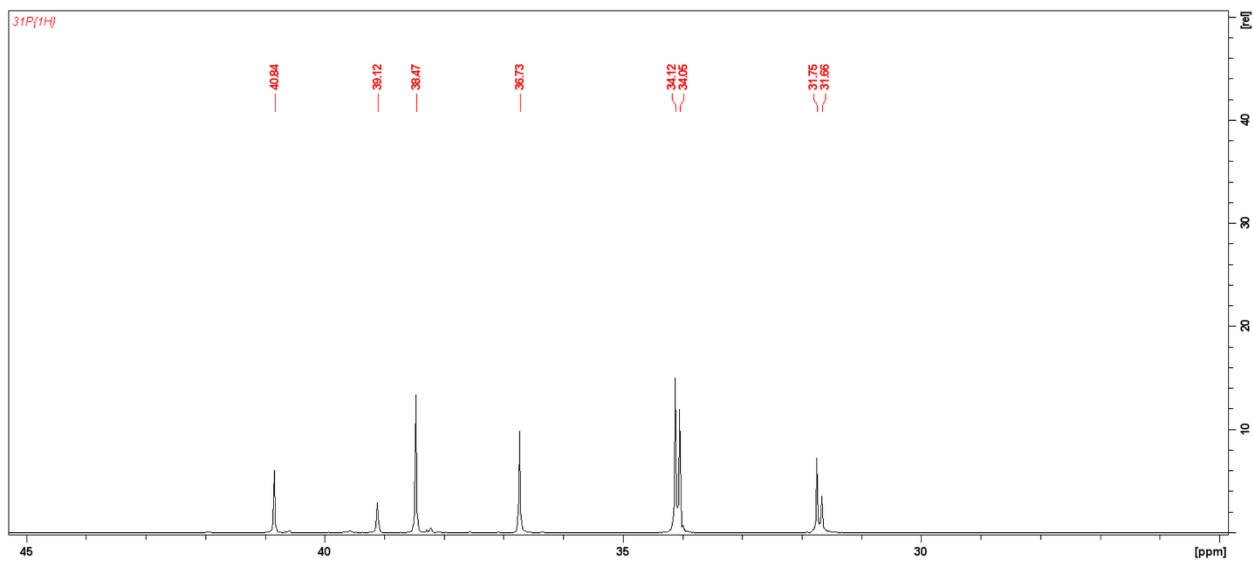

**Figure S16.**  $^{31}\text{P}\{^1\text{H}\}$  NMR (THF- $d_8$ , 162 MHz) spectrum of isolated white precipitate of  $\{(\text{Ph})_2(\text{H})\text{C}-\text{P}-\text{P}t\text{Bu}_2\} \{\mu^2-(\text{S}-\text{C}_6\text{H}_4-\text{S})\} (t\text{Bu}_2\text{P}-\text{P}-\text{C}(\text{H})(\text{Ph})_2)$  (**3b**) in the range from 45 ppm to 25 ppm.

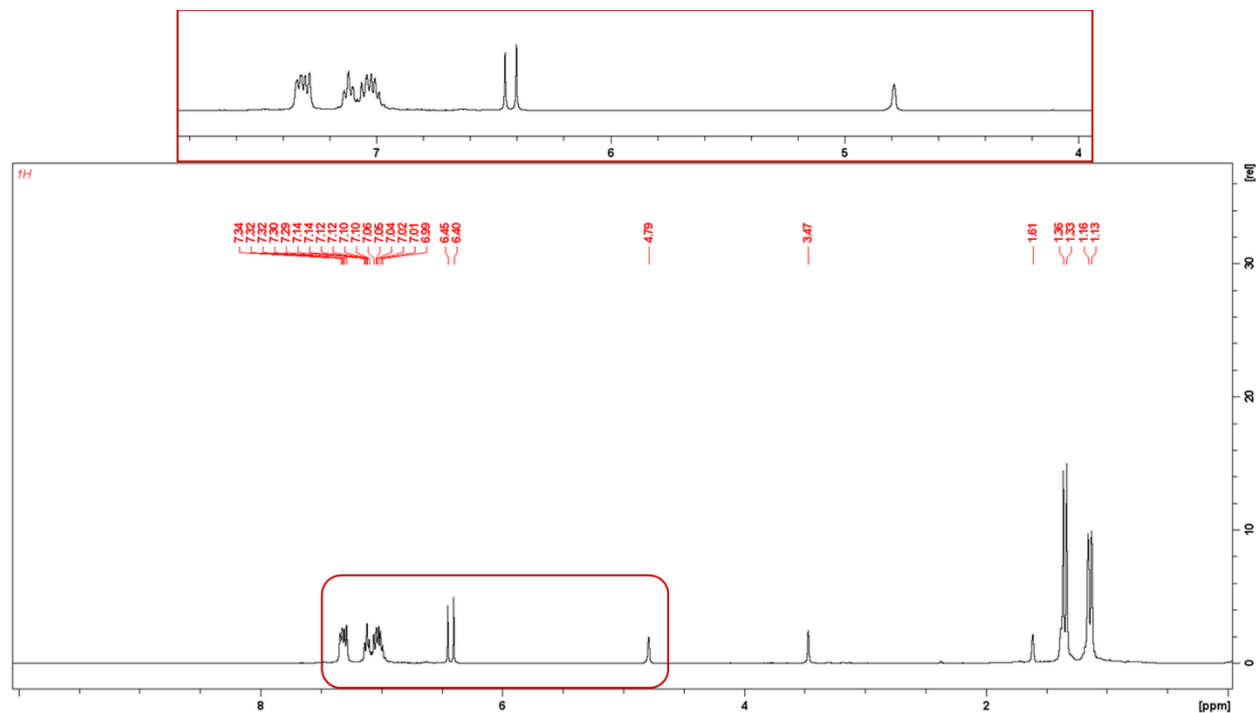

**Figure S17.**  $^1\text{H}$  NMR (THF- $d_8$ , 400 MHz) spectrum of isolated white precipitate of  $\{(\text{Ph})_2(\text{H})\text{C-P-P}t\text{Bu}_2\} \{\mu^2\text{-(S-C}_6\text{H}_4\text{-S)}\} \{t\text{Bu}_2\text{P-P-C(H)(Ph)}_2\}$  (**3b**).

- 7.34 – 6.40 ppm, 24H, aromatic protons,  $\{(\text{Ph})_2(\text{H})\text{C-P-P}t\text{Bu}_2\} \{\mu^2\text{-(S-C}_6\text{H}_4\text{-S)}\} \{t\text{Bu}_2\text{P-P-C(H)(Ph)}_2\}$ ;
- 4.79 ppm, broad s, 2 H,  $\{(\text{Ph})_2(\text{H})\text{C-P-P}t\text{Bu}_2\} \{\mu^2\text{-(S-C}_6\text{H}_4\text{-S)}\} \{t\text{Bu}_2\text{P-P-C(H)(Ph)}_2\}$ ;
- 3.47 and 1.61 ppm, 4 H of THF;
- 1.34 ppm, d,  $J_{\text{P-H}} = 11.6$  Hz, 18H,  $\{(\text{Ph})_2(\text{H})\text{C-P-P}t\text{Bu}_2\} \{\mu^2\text{-(S-C}_6\text{H}_4\text{-S)}\} \{t\text{Bu}_2\text{P-P-C(H)(Ph)}_2\}$ .
- 1.25 ppm, broad d,  $J_{\text{P-H}} = 11.6$  Hz, 18H,  $\{(\text{Ph})_2(\text{H})\text{C-P-P}t\text{Bu}_2\} \{\mu^2\text{-(S-C}_6\text{H}_4\text{-S)}\} \{t\text{Bu}_2\text{P-P-C(H)(Ph)}_2\}$ ;

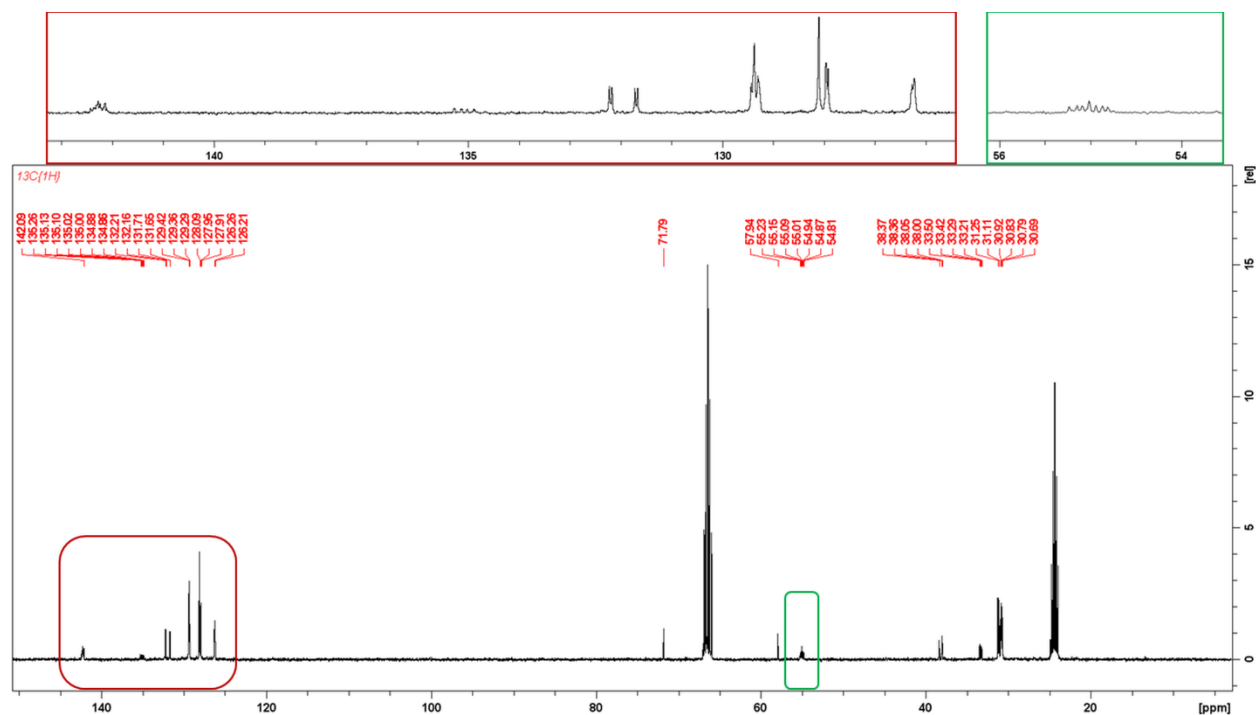

**Figure S18.**  $^{13}\text{C}\{^1\text{H}\}$  NMR (THF- $d_8$ , 100.62 MHz) spectrum of isolated white precipitate of  $\{(\text{Ph})_2(\text{H})\text{C}-\text{P}-\text{P}t\text{Bu}_2\} \{\mu^2-(\text{S}-\text{C}_6\text{H}_4-\text{S})\} \{t\text{Bu}_2\text{P}-\text{P}-\text{C}(\text{H})(\text{Ph})_2\}$  (**3b**).

Aromatic carbon atoms:

- 142.26 – 142.09 ppm, m;
- 135.06 ppm, ddd,  $J_{\text{P-C}} = 24.4$  Hz,  $J_{\text{P-C}} = 13.5$  Hz,  $J_{\text{P-C}} = 1.9$  Hz;
- 132.19 ppm, d,  $J_{\text{P-C}} = 4.5$  Hz;
- 131.68 ppm, dd,  $J_{\text{P-C}} = 5.4$  Hz;
- 129.72 ppm, d,  $J_{\text{P-C}} = 12.7$  Hz;
- 129.36 ppm, s;
- 128.09 ppm, s;
- 127.93 ppm, dd,  $J_{\text{P-C}} = 4.5$  Hz,  $J_{\text{P-C}} = 0.9$  Hz;
- 126.24 ppm, d,  $J_{\text{P-C}} = 0.9$  Hz;

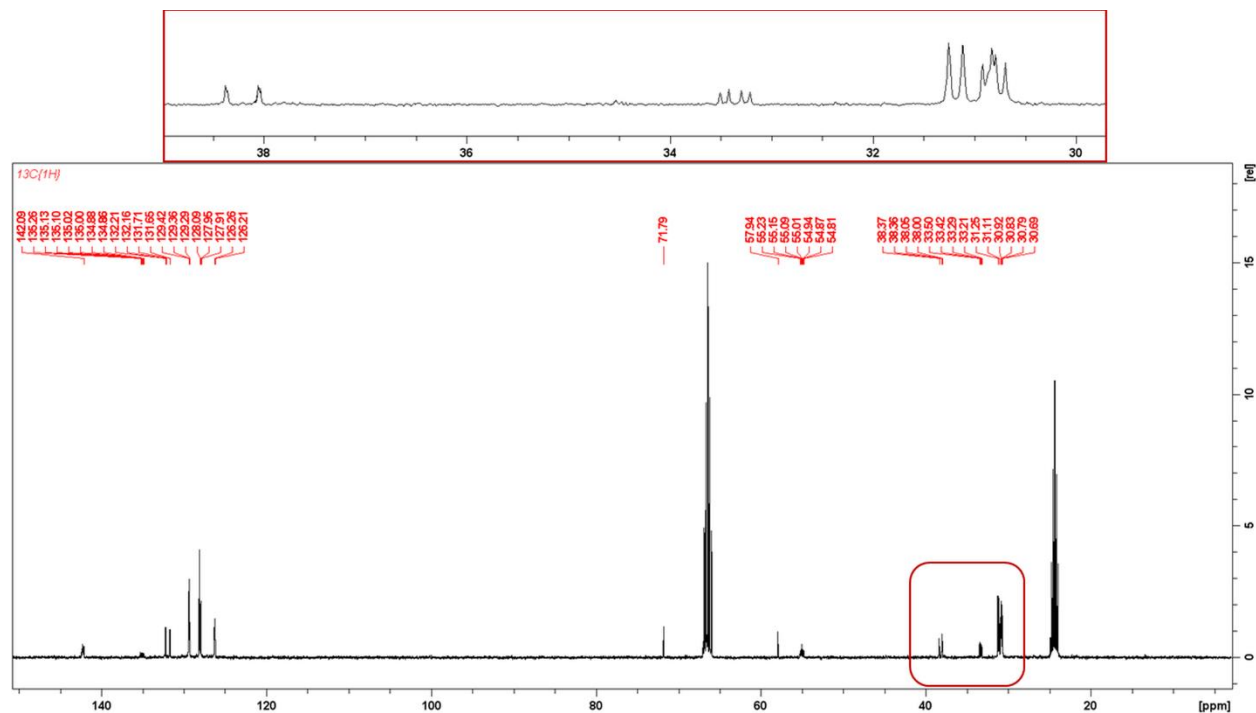

**Figure S19.**  $^{13}\text{C}\{^1\text{H}\}$  NMR (THF- $d_8$ , 100.62 MHz) spectrum of isolated white precipitate of  $\{(\text{Ph})_2(\text{H})\text{C}-\text{P}-\text{P}t\text{Bu}_2\} \{\mu^2-(\text{S}-\text{C}_6\text{H}_4-\text{S})\} \{t\text{Bu}_2\text{P}-\text{P}-\text{C}(\text{H})(\text{Ph})_2\}$  (**3b**).

- 55.01 ppm, ddd,  $J_{\text{P-C}} = 21.6$  Hz,  $J_{\text{P-C}} = 14.5$  Hz,  $J_{\text{P-C}} = 8.2$  Hz,  $\{(\text{Ph})_2(\text{H})\text{C}-\text{P}-\text{P}t\text{Bu}_2\} \{\mu^2-(\text{S}-\text{C}_6\text{H}_4-\text{S})\} \{t\text{Bu}_2\text{P}-\text{P}-\text{C}(\text{H})(\text{Ph})_2\}$ ;
- 38.2 ppm, dd,  $J_{\text{P-C}} = 32.7$  Hz,  $J_{\text{P-C}} = 1.8$  Hz, d,  $\{(\text{Ph})_2(\text{H})\text{C}-\text{P}-\text{P}\{\text{C}(\text{CH}_3)_3\}_2\} \{\mu^2-(\text{S}-\text{C}_6\text{H}_4-\text{S})\} \{\{\text{C}(\text{CH}_3)_3\}_2\text{P}-\text{P}-\text{C}(\text{H})(\text{Ph})_2\}$ ;
- 33.36 ppm, dd,  $J_{\text{P-C}} = 20.9$  Hz,  $J_{\text{P-C}} = 8.2$  Hz,  $\{(\text{Ph})_2(\text{H})\text{C}-\text{P}-\text{P}\{\text{C}(\text{CH}_3)_3\}_2\} \{\mu^2-(\text{S}-\text{C}_6\text{H}_4-\text{S})\} \{\{\text{C}(\text{CH}_3)_3\}_2\text{P}-\text{P}-\text{C}(\text{H})(\text{Ph})_2\}$ ;
- 31.17 ppm, dd,  $J_{\text{P-C}} = 13.6$  Hz,  $J_{\text{P-C}} = 0.9$  Hz,  $\{(\text{Ph})_2(\text{H})\text{C}-\text{P}-\text{P}\{\text{C}(\text{CH}_3)_3\}_2\} \{\mu^2-(\text{S}-\text{C}_6\text{H}_4-\text{S})\} \{\{\text{C}(\text{CH}_3)_3\}_2\text{P}-\text{P}-\text{C}(\text{H})(\text{Ph})_2\}$ ;
- 30.8 ppm, dd,  $J_{\text{P-C}} = 13.6$  Hz,  $J_{\text{P-C}} = 9.0$  Hz,  $\{(\text{Ph})_2(\text{H})\text{C}-\text{P}-\text{P}\{\text{C}(\text{CH}_3)_3\}_2\} \{\mu^2-(\text{S}-\text{C}_6\text{H}_4-\text{S})\} \{\{\text{C}(\text{CH}_3)_3\}_2\text{P}-\text{P}-\text{C}(\text{H})(\text{Ph})_2\}$ ;

### B.1.4. Reaction of 1 with HSCH<sub>2</sub>C<sub>6</sub>H<sub>4</sub>CH<sub>2</sub>SH

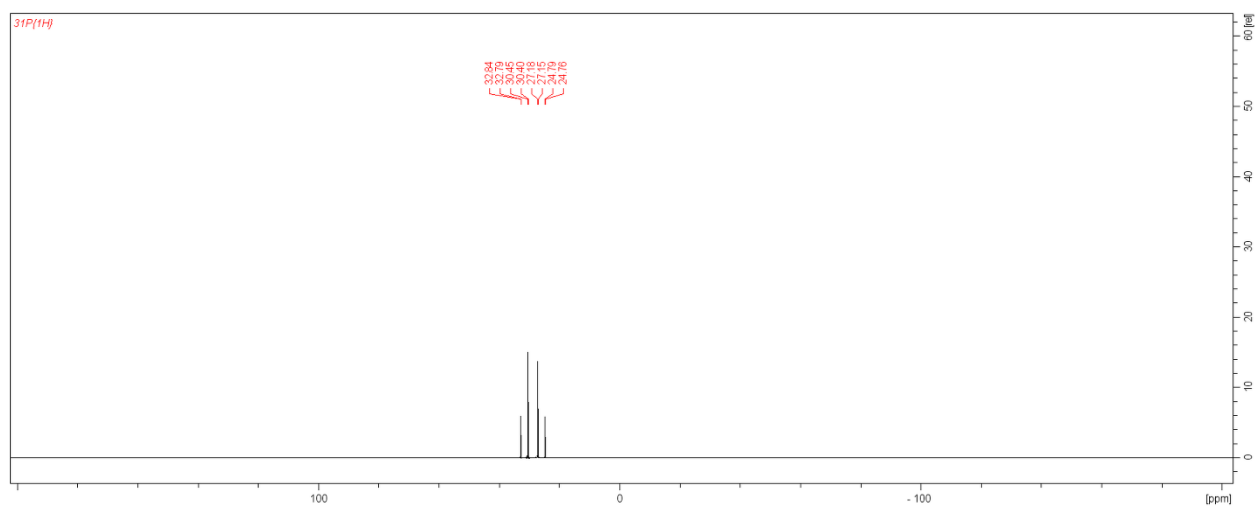

**Figure S20.**  $^{31}\text{P}\{^1\text{H}\}$  NMR ( $\text{C}_6\text{D}_6$ , 162 MHz) spectrum of isolated crystals of  $\{(\text{Ph})_2(\text{H})\text{C}-\text{P}-\text{P}t\text{Bu}_2\} \{\mu^2-(\text{S}-\text{CH}_2-\text{C}_6\text{H}_4-\text{CH}_2-\text{S})\} \{t\text{Bu}_2\text{P}-\text{P}-\text{C}(\text{H})(\text{Ph})_2\}$  (**3c**).

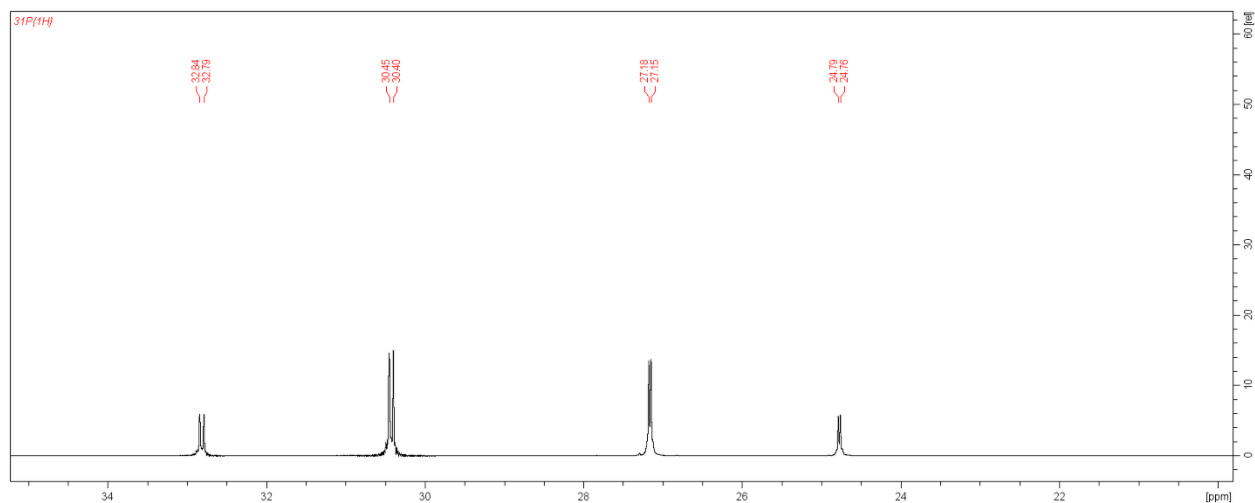

**Figure S21.**  $^{31}\text{P}\{^1\text{H}\}$  NMR ( $\text{C}_6\text{D}_6$ , 162 MHz) spectrum of isolated crystals of  $\{(\text{Ph})_2(\text{H})\text{C}-\text{P}-\text{P}t\text{Bu}_2\} \{\mu^2-(\text{S}-\text{CH}_2-\text{C}_6\text{H}_4-\text{CH}_2-\text{S})\} \{t\text{Bu}_2\text{P}-\text{P}-\text{C}(\text{H})(\text{Ph})_2\}$  (**3c**) in the range from 35 ppm to 20 ppm.

Mixture of two diastereomers:

- 31.64 ppm, d,  $J_{\text{P-P}} = 387.2$  Hz,  $\{(\text{Ph})_2(\text{H})\text{C}-\text{P}-\text{P}t\text{Bu}_2\} \{\mu^2-(\text{S}-\text{CH}_2-\text{C}_6\text{H}_4-\text{CH}_2-\text{S})\} \{t\text{Bu}_2\text{P}-\text{P}-\text{C}(\text{H})(\text{Ph})_2\}$ ;
- 25.96 ppm, d,  $J_{\text{P-P}} = 387.2$  Hz,  $\{(\text{Ph})_2(\text{H})\text{C}-\text{P}-\text{P}t\text{Bu}_2\} \{\mu^2-(\text{S}-\text{CH}_2-\text{C}_6\text{H}_4-\text{CH}_2-\text{S})\} \{t\text{Bu}_2\text{P}-\text{P}-\text{C}(\text{H})(\text{Ph})_2\}$ ;
- 31.59 ppm, d,  $J_{\text{P-P}} = 386.0$  Hz,  $\{(\text{Ph})_2(\text{H})\text{C}-\text{P}-\text{P}t\text{Bu}_2\} \{\mu^2-(\text{S}-\text{CH}_2-\text{C}_6\text{H}_4-\text{CH}_2-\text{S})\} \{t\text{Bu}_2\text{P}-\text{P}-\text{C}(\text{H})(\text{Ph})_2\}$ ;
- 25.98 ppm, d,  $J_{\text{P-P}} = 386.0$  Hz,  $\{(\text{Ph})_2(\text{H})\text{C}-\text{P}-\text{P}t\text{Bu}_2\} \{\mu^2-(\text{S}-\text{CH}_2-\text{C}_6\text{H}_4-\text{CH}_2-\text{S})\} \{t\text{Bu}_2\text{P}-\text{P}-\text{C}(\text{H})(\text{Ph})_2\}$ ;

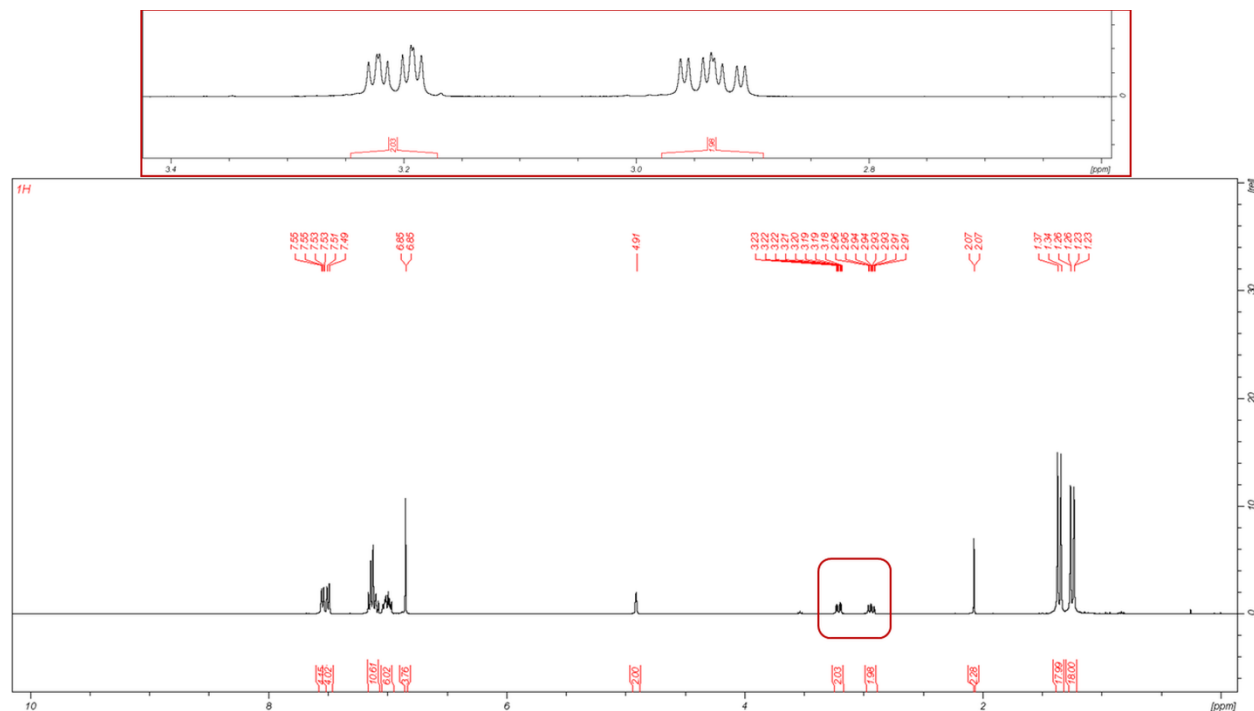

**Figure S22.**  $^1\text{H}$  NMR ( $\text{C}_6\text{D}_6$ , 400 MHz) spectrum of isolated crystals of  $\{(\text{Ph})_2(\text{H})\text{C-P-P}t\text{Bu}_2\} \{\mu^2\text{-(S-CH}_2\text{-C}_6\text{H}_4\text{-CH}_2\text{-S)}\} \{t\text{Bu}_2\text{P-P-C(H)(Ph)}_2\}$  (**3c**).

- 7.55 – 6.96 ppm, 24H, aromatic protons,  $\{(\text{Ph})_2(\text{H})\text{C-P-P}t\text{Bu}_2\} \{\mu^2\text{-(S-CH}_2\text{-C}_6\text{H}_4\text{-CH}_2\text{-S)}\} \{t\text{Bu}_2\text{P-P-C(H)(Ph)}_2\}$ ;
- 6.85 and 2.07 ppm, 8H, residual amounts of toluene used in the synthesis;
- 4.91 ppm, broad t,  $J_{\text{P-H}} = 2.3\text{ Hz}$ , 2 H,  $\{(\text{Ph})_2(\text{H})\text{C-P-P}t\text{Bu}_2\} \{\mu^2\text{-(S-CH}_2\text{-C}_6\text{H}_4\text{-CH}_2\text{-S)}\} \{t\text{Bu}_2\text{P-P-C(H)(Ph)}_2\}$ ;
- 3.21 ppm, qd,  $J_{\text{H-H}} = 11.7\text{ Hz}$ ,  $J_{\text{H-H}} = 3.7\text{ Hz}$ ,  $J_{\text{P-H}} = 2.8\text{ Hz}$ , 2H,  $\{(\text{Ph})_2(\text{H})\text{C-P-P}t\text{Bu}_2\} \{\mu^2\text{-(S-CH}_2\text{-C}_6\text{H}_4\text{-CH}_2\text{-S)}\} \{t\text{Bu}_2\text{P-P-C(H)(Ph)}_2\}$ ;
- 2.93 ppm, qd,  $J_{\text{H-H}} = 11.7\text{ Hz}$ ,  $J_{\text{H-H}} = 7.8\text{ Hz}$ ,  $J_{\text{P-H}} = 2.8\text{ Hz}$ , 2H,  $\{(\text{Ph})_2(\text{H})\text{C-P-P}t\text{Bu}_2\} \{\mu^2\text{-(S-CH}_2\text{-C}_6\text{H}_4\text{-CH}_2\text{-S)}\} \{t\text{Bu}_2\text{P-P-C(H)(Ph)}_2\}$ ;
- 1.35 ppm, d,  $J_{\text{P-H}} = 11.7\text{ Hz}$ , 18H,  $\{(\text{Ph})_2(\text{H})\text{C-P-P}t\text{Bu}_2\} \{\mu^2\text{-(S-CH}_2\text{-C}_6\text{H}_4\text{-CH}_2\text{-S)}\} \{t\text{Bu}_2\text{P-P-C(H)(Ph)}_2\}$ ;
- 1.25 ppm, dd,  $J_{\text{P-H}} = 11.4\text{ Hz}$ ,  $J_{\text{P-H}} = 1.4\text{ Hz}$ , 18H,  $\{(\text{Ph})_2(\text{H})\text{C-P-P}t\text{Bu}_2\} \{\mu^2\text{-(S-CH}_2\text{-C}_6\text{H}_4\text{-CH}_2\text{-S)}\} \{t\text{Bu}_2\text{P-P-C(H)(Ph)}_2\}$ ;



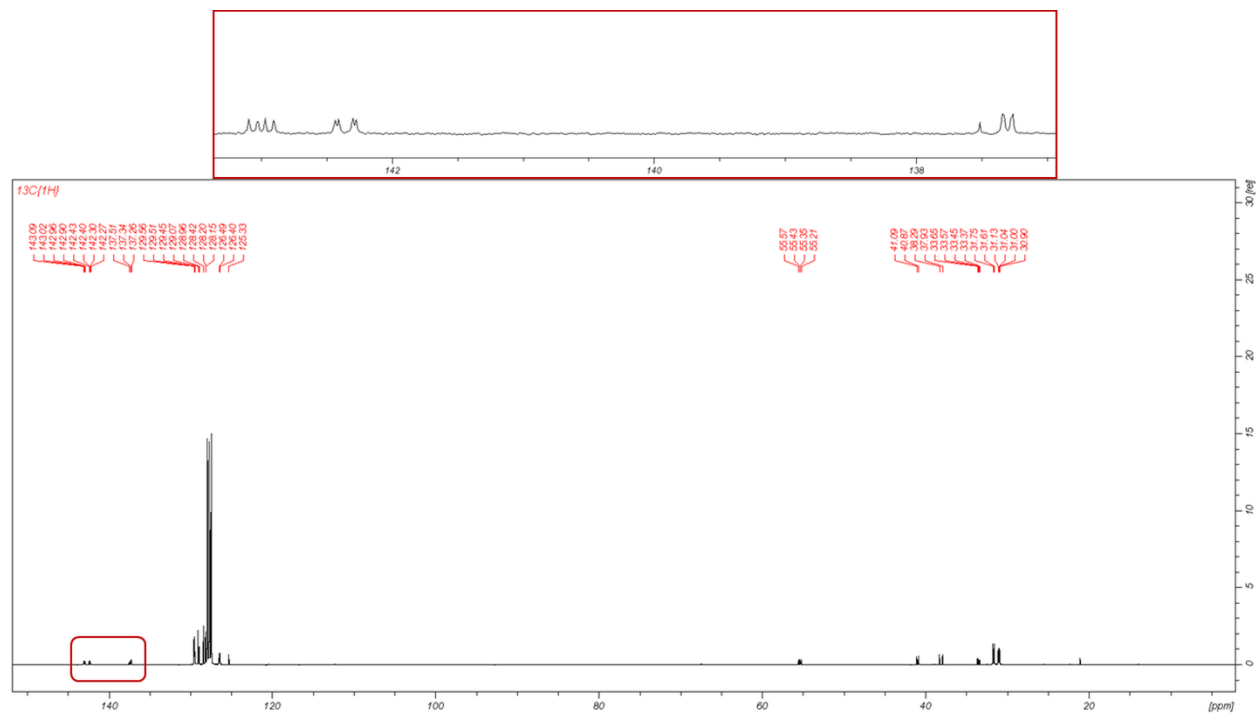

**Figure S23.**  $^{13}\text{C}\{^1\text{H}\}$  NMR ( $\text{C}_6\text{D}_6$ , 100.62 MHz) spectrum of isolated crystals of  $\{(\text{Ph})_2(\text{H})\text{C}-\text{P}-\text{PtBu}_2\} \{\mu^2-(\text{S}-\text{CH}_2-\text{C}_6\text{H}_4-\text{CH}_2-\text{S})\} \{t\text{Bu}_2\text{P}-\text{P}-\text{C}(\text{H})(\text{Ph})_2\}$  (**3c**).

Aromatic carbon atoms:

- 142.99 ppm, dd,  $J_{\text{P-C}} = 13.0$  Hz,  $J_{\text{P-C}} = 6.7$  Hz;
- 142.35 ppm, dd,  $J_{\text{P-C}} = 13.6$  Hz,  $J_{\text{P-C}} = 2.7$  Hz;
- 137.51 ppm, s;
- 137.31 ppm, dd,  $J_{\text{P-C}} = 6.9$  Hz,  $J_{\text{P-C}} = 1.3$  Hz;
- 129.54 ppm, d,  $J_{\text{P-C}} = 5.8$  Hz;
- 129.49 ppm, d,  $J_{\text{P-C}} = 10.2$  Hz;
- 129.45 ppm, d,  $J_{\text{P-C}} = 2.0$  Hz;
- 129.07 ppm, s;
- 128.96 ppm, s;
- 128.42 ppm, s;
- 128.20 ppm, s;
- 128.15 ppm, s;
- 126.49 ppm, d,  $J_{\text{P-C}} = 1.8$  Hz;
- 126.39 ppm, d,  $J_{\text{P-C}} = 2.2$  Hz;
- 125.33 ppm, s;

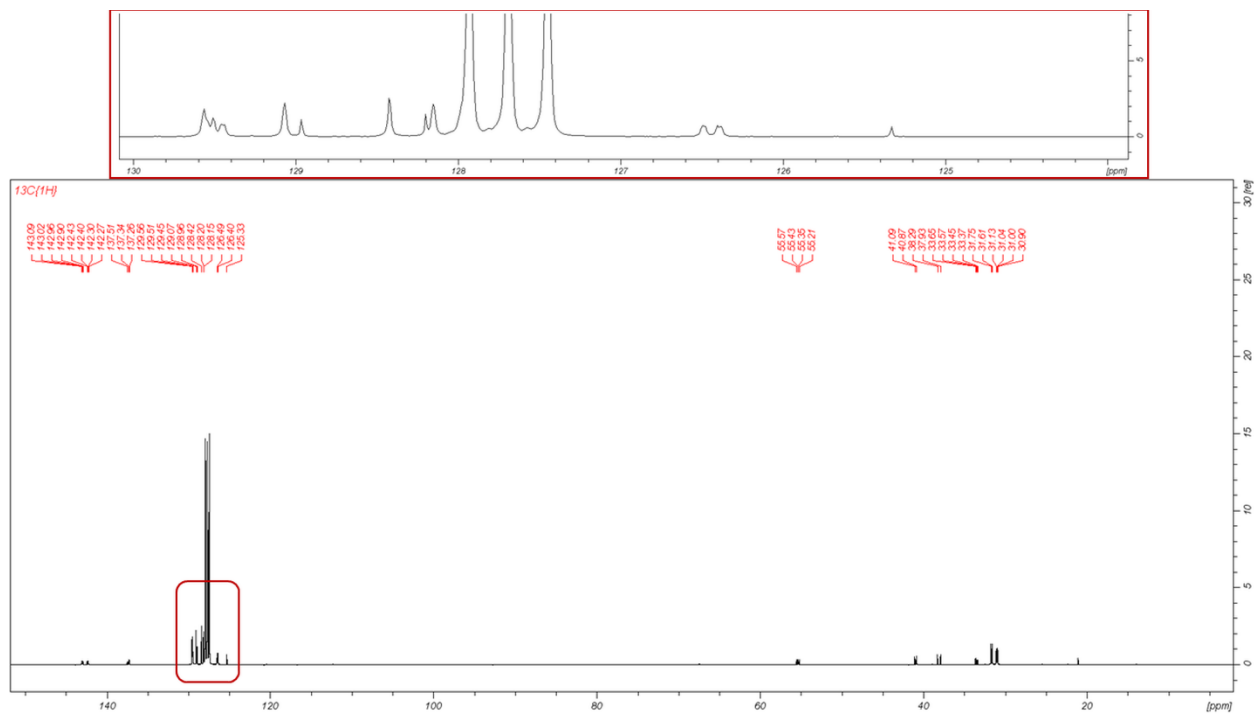

**Figure S24.** <sup>13</sup>C{<sup>1</sup>H} NMR (C<sub>6</sub>D<sub>6</sub>, 100.62 MHz) spectrum of isolated crystals of {(Ph)<sub>2</sub>(H)C-PtBu<sub>2</sub>} {μ<sup>2</sup>-(S-CH<sub>2</sub>-C<sub>6</sub>H<sub>4</sub>-CH<sub>2</sub>-S)} {tBu<sub>2</sub>P-P-C(H)(Ph)<sub>2</sub>} (**3c**).

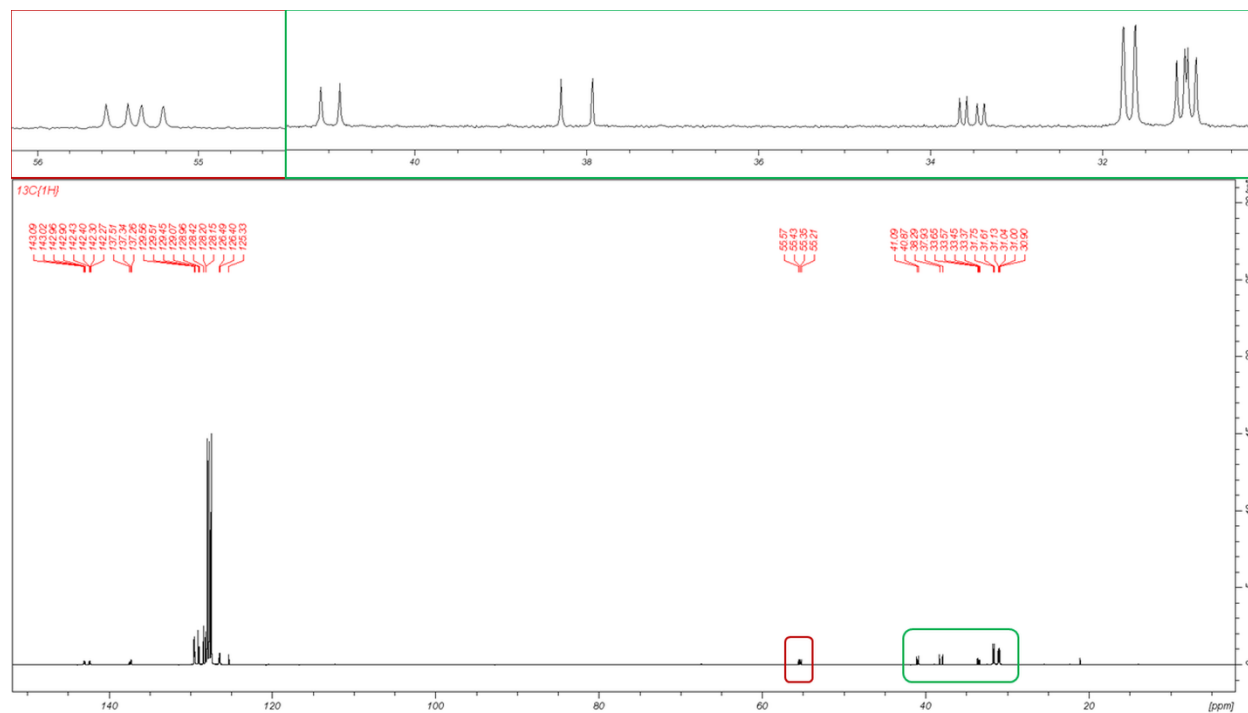

**Figure S25.**  $^{13}\text{C}\{^1\text{H}\}$  NMR ( $\text{C}_6\text{D}_6$ , 100.62 MHz) spectrum of isolated crystals of  $\{(\text{Ph})_2(\text{H})\text{C}-\text{P}-\text{PtBu}_2\} \{\mu^2-(\text{S}-\text{CH}_2-\text{C}_6\text{H}_4-\text{CH}_2-\text{S})\} \{t\text{Bu}_2\text{P}-\text{P}-\text{C}(\text{H})(\text{Ph})_2\}$  (**3c**).

- 55.39 ppm, dd,  $J_{\text{P-C}} = 22.0$  Hz,  $J_{\text{P-C}} = 13.6$  Hz,  $\{(\text{Ph})_2(\text{H})\text{C}-\text{P}-\text{PtBu}_2\} \{\mu^2-(\text{S}-\text{CH}_2-\text{C}_6\text{H}_4-\text{CH}_2-\text{S})\} \{t\text{Bu}_2\text{P}-\text{P}-\text{C}(\text{H})(\text{Ph})_2\}$ ;
- 40.98 ppm, d,  $J_{\text{P-C}} = 13.6$  Hz,  $\{(\text{Ph})_2(\text{H})\text{C}-\text{P}-\text{PtBu}_2\} \{\mu^2-(\text{S}-\text{CH}_2-\text{C}_6\text{H}_4-\text{CH}_2-\text{S})\} \{t\text{Bu}_2\text{P}-\text{P}-\text{C}(\text{H})(\text{Ph})_2\}$ ;
- 38.11 ppm, d,  $J_{\text{P-C}} = 36.8$  Hz, d,  $\{(\text{Ph})_2(\text{H})\text{C}-\text{P}-\text{P}\{\text{C}(\text{CH}_3)_3\}_2\} \{\mu^2-(\text{S}-\text{CH}_2-\text{C}_6\text{H}_4-\text{CH}_2-\text{S})\} \{\{\text{C}(\text{CH}_3)_3\}_2\text{P}-\text{P}-\text{C}(\text{H})(\text{Ph})_2\}$ ;
- 33.52 ppm, dd,  $J_{\text{P-C}} = 20.4$  Hz,  $J_{\text{P-C}} = 8.1$  Hz,  $\{(\text{Ph})_2(\text{H})\text{C}-\text{P}-\text{P}\{\text{C}(\text{CH}_3)_3\}_2\} \{\mu^2-(\text{S}-\text{CH}_2-\text{C}_6\text{H}_4-\text{CH}_2-\text{S})\} \{\{\text{C}(\text{CH}_3)_3\}_2\text{P}-\text{P}-\text{C}(\text{H})(\text{Ph})_2\}$ ;
- 31.69 ppm, dd,  $J_{\text{P-C}} = 13.7$  Hz,  $J_{\text{P-C}} = 1.22$  Hz,  $\{(\text{Ph})_2(\text{H})\text{C}-\text{P}-\text{P}\{\text{C}(\text{CH}_3)_3\}_2\} \{\mu^2-(\text{S}-\text{CH}_2-\text{C}_6\text{H}_4-\text{CH}_2-\text{S})\} \{\{\text{C}(\text{CH}_3)_3\}_2\text{P}-\text{P}-\text{C}(\text{H})(\text{Ph})_2\}$ ;
- 31.02 ppm, dd,  $J_{\text{P-C}} = 13.0$  Hz,  $J_{\text{P-C}} = 9.7$  Hz,  $\{(\text{Ph})_2(\text{H})\text{C}-\text{P}-\text{P}\{\text{C}(\text{CH}_3)_3\}_2\} \{\mu^2-(\text{S}-\text{CH}_2-\text{C}_6\text{H}_4-\text{CH}_2-\text{S})\} \{\{\text{C}(\text{CH}_3)_3\}_2\text{P}-\text{P}-\text{C}(\text{H})(\text{Ph})_2\}$ ;
- 21.08 ppm, methyl groups carbon atom from toluene;

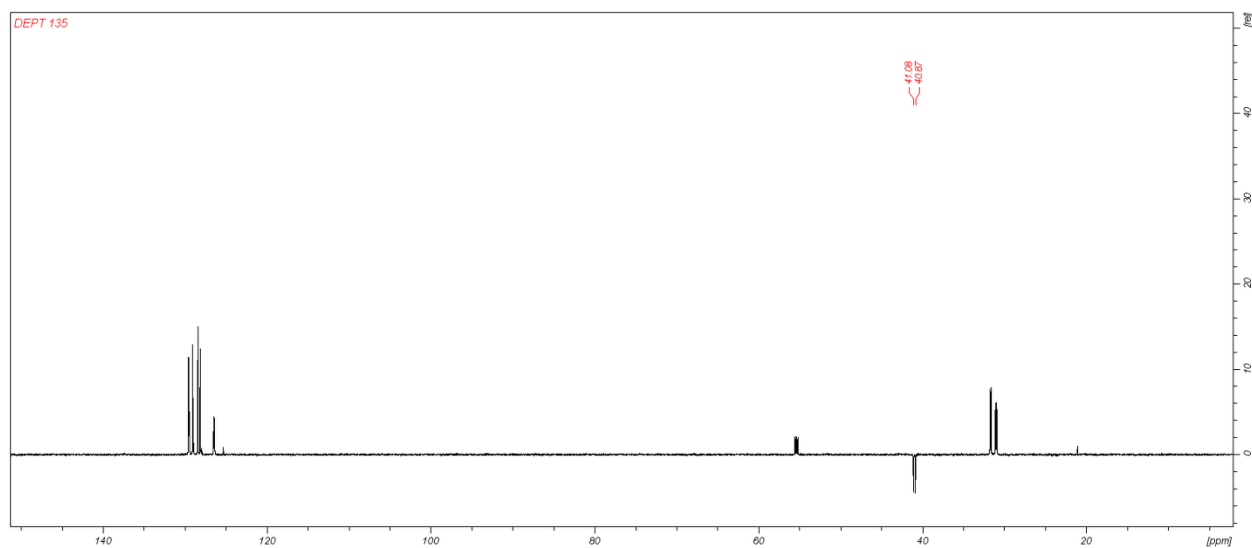

**Figure S26.**  $^{13}\text{C}\{^1\text{H}\}$  NMR-dept135 ( $\text{C}_6\text{D}_6$ , 100.62 MHz) spectrum of isolated crystals of  $\{(\text{Ph})_2(\text{H})\text{C}-\text{P}-\text{P}t\text{Bu}_2\} \{\mu^2-(\text{S}-\text{CH}_2-\text{C}_6\text{H}_4-\text{CH}_2-\text{S})\} \{t\text{Bu}_2\text{P}-\text{P}-\text{C}(\text{H})(\text{Ph})_2\}$  (**3c**).

## B.2. Solid state NMR

NMR experiments were performed using a Jeol JNM-ECZ500R 500 MHz spectrometer equipped with an AUTOMAS 3.2 mm solid state probe. Samples consisting of 75–100 mg were spun in a Joel 3.2 mm of. zirconium oxide rotor at a spinning rate of 10000 Hz. A single contact cross polarization technique was employed using a contact time of 2 ms (recycled delay time 5s) with proton decoupling during the acquisition period. All measurements were conducted at 300K.  $\text{NaH}_2\text{PO}_4$  was used as the standard for  $^{31}\text{P}$  MAS NMR measurements.

### B.2.1. Crystals of *rac*-poly\_3a\_Cu

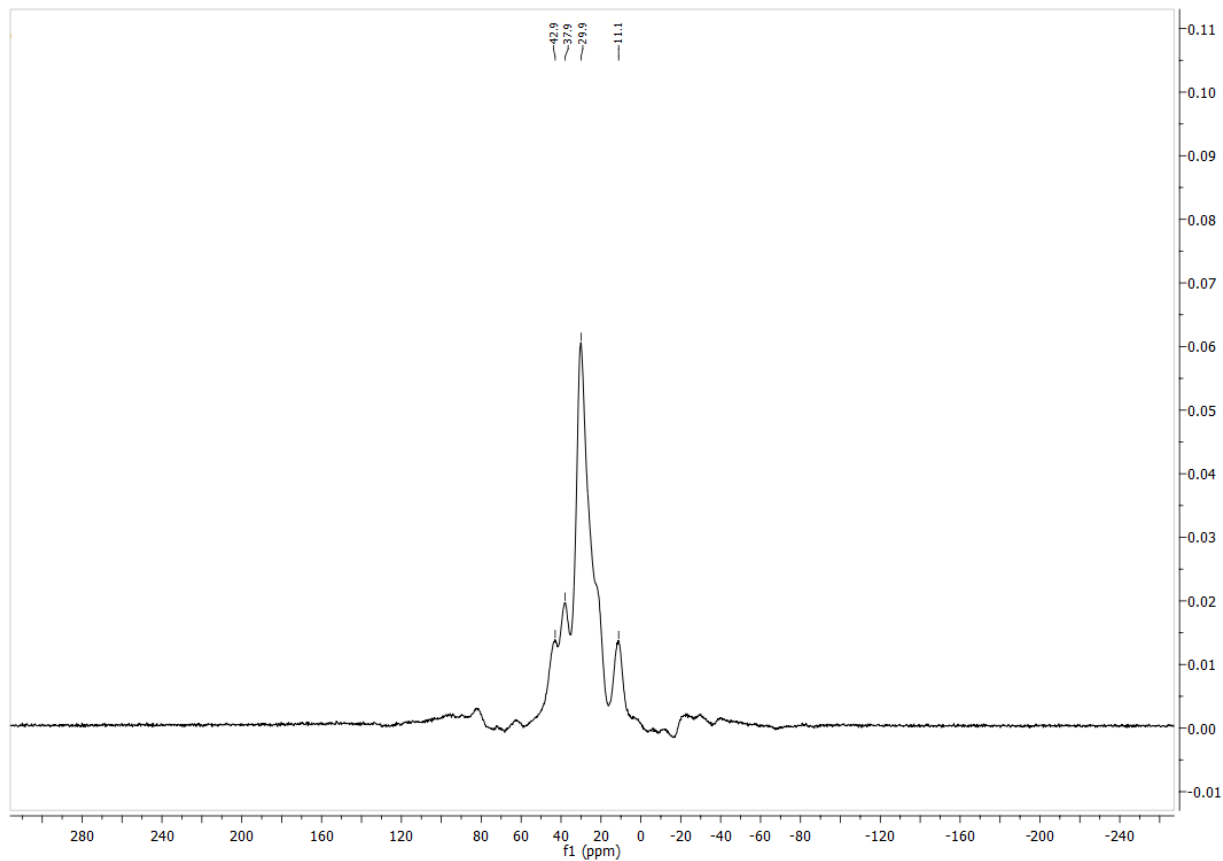

Figure S27.  $^{31}\text{P}$  CPMAS spectrum of *rac*-poly\_3a\_Cu.

## B.2.2. Crystals of *meso*-poly\_3a\_Ag

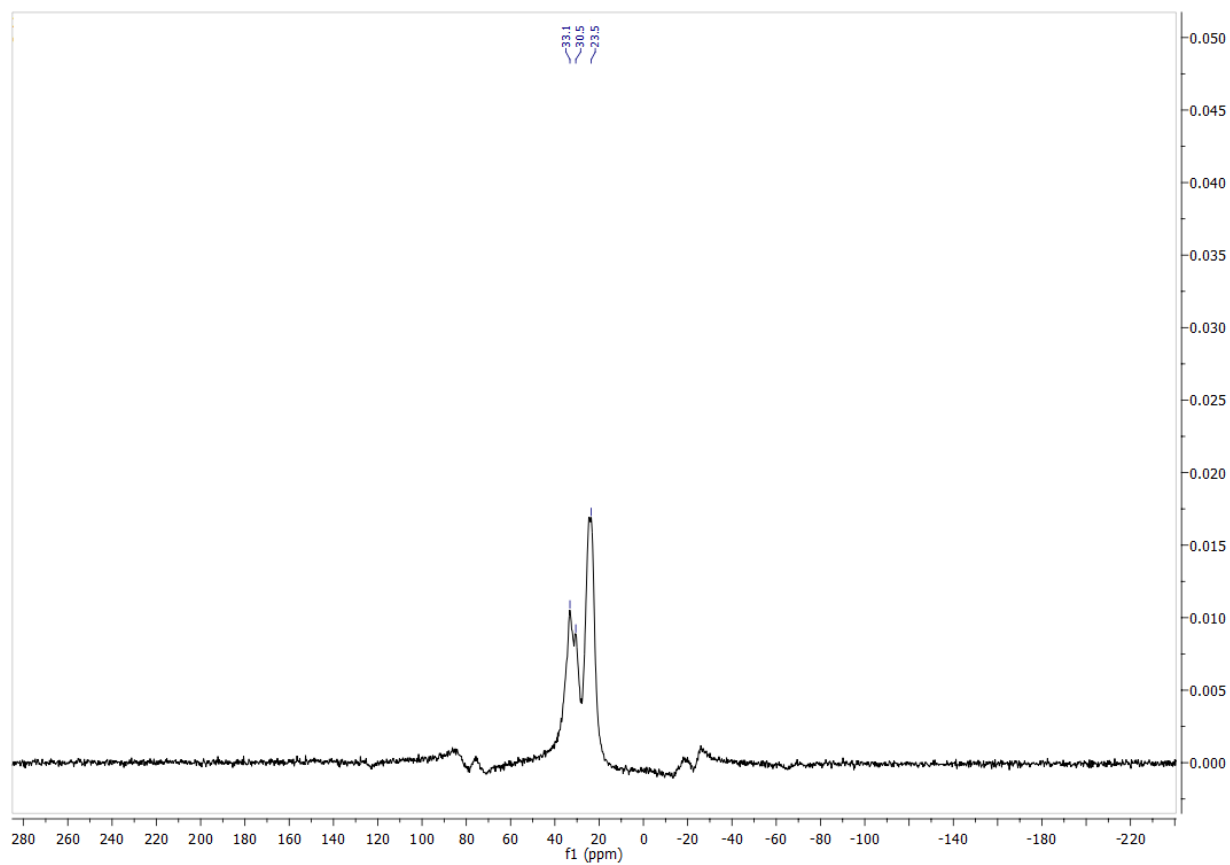

Figure S28.  $^{31}\text{P}$  CPMAS spectrum of *meso*-poly\_3a\_Ag.

### B.2.3. Crystals of *rac*-poly\_3c\_Cu

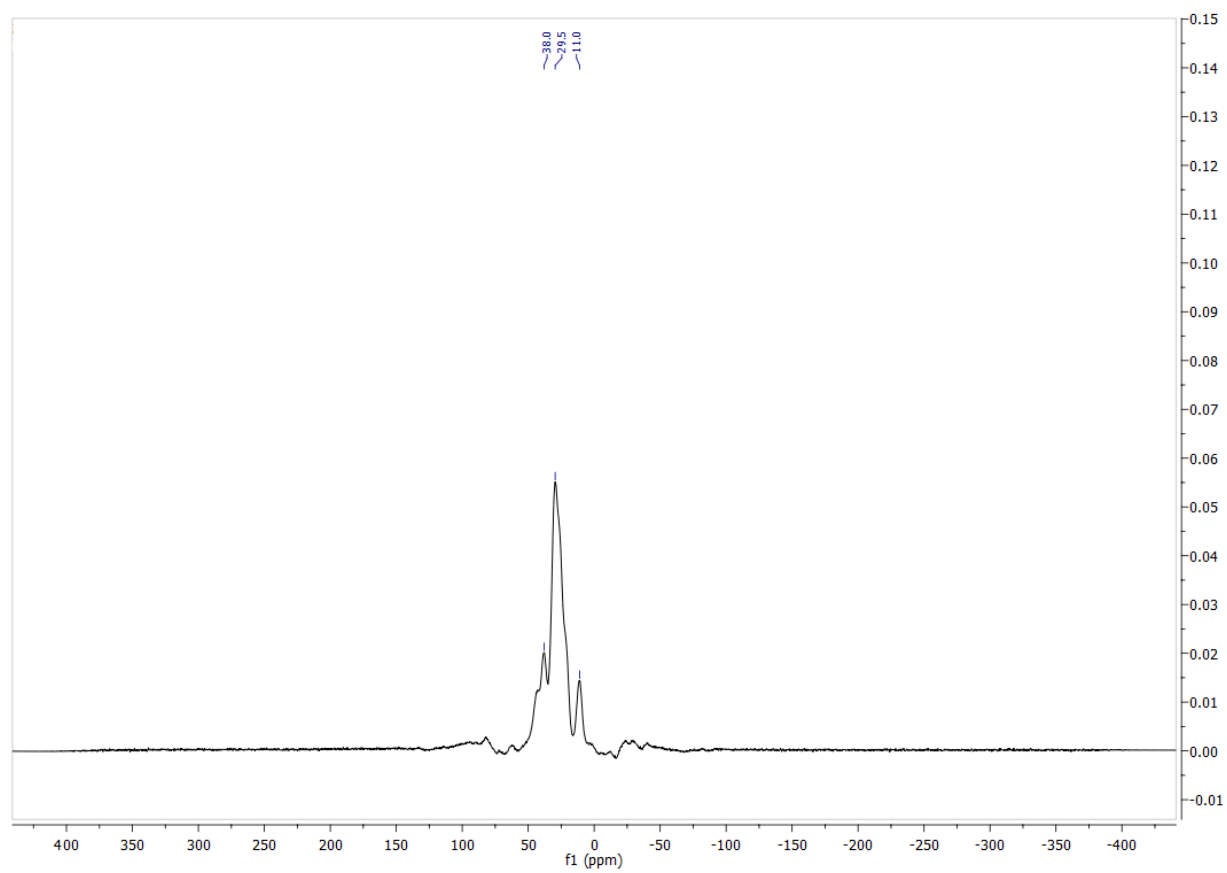

**Figure S29.**  $^{31}\text{P}$  CPMAS spectrum of *rac*-poly\_3c\_Cu.

### B.2.4. Crystals of *rac*-poly\_3c\_Ag

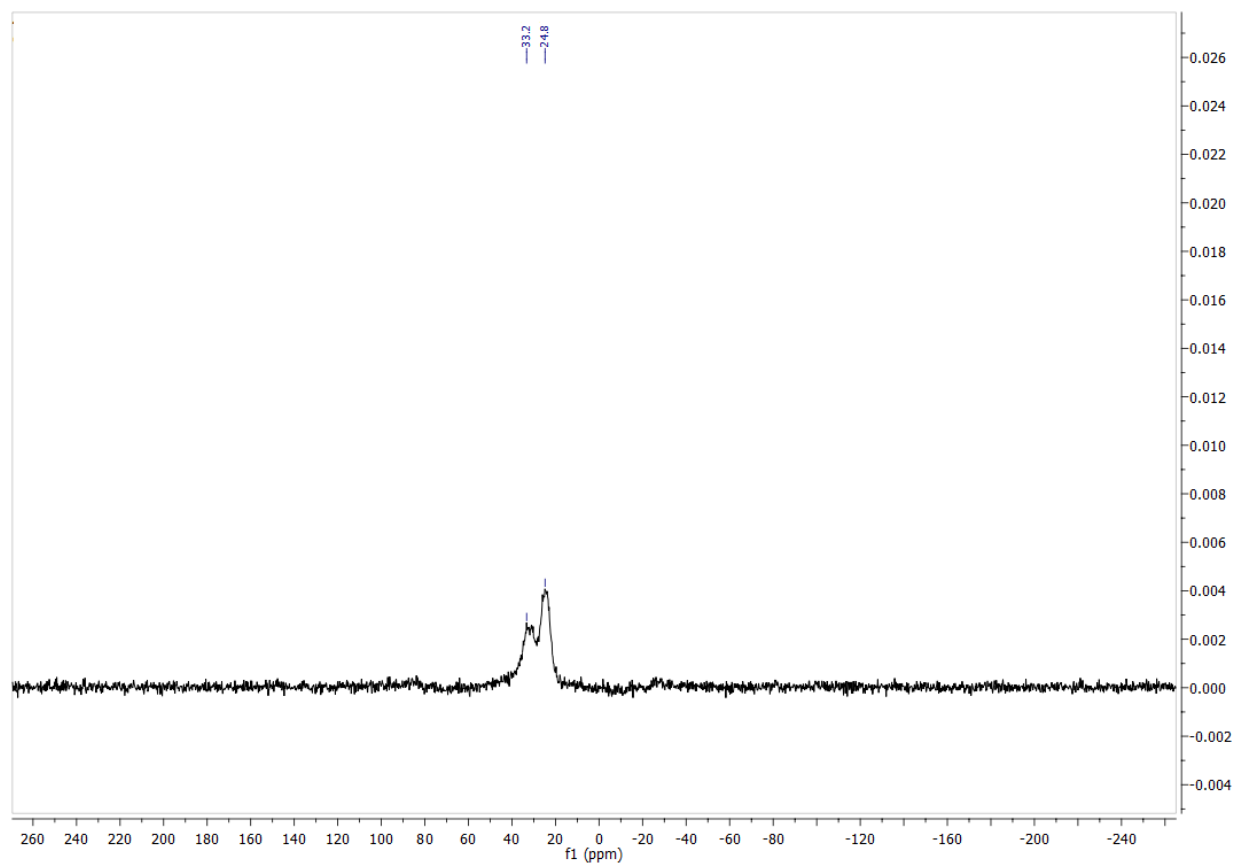

**Figure S30.**  $^{31}\text{P}$  CPMAS spectrum of *rac*-poly\_3c\_Ag.



## PART B. X-ray data

The X-ray intensity data for were measured with an IPDS2T diffractometer equipped with an STOE image plate detector system and microfocus X-ray sources providing  $K\alpha$  radiation by high-grade multilayer X-ray mirror optics for Mo ( $\lambda = 0.71073 \text{ \AA}$ , **3c**, *rac-poly\_3a\_Cu* and) and Cu ( $\lambda = 1.54186 \text{ \AA}$ , **3a**, *meso-poly\_3a\_Ag*) wavelengths. The X-ray intensity data for *rac-poly\_3c\_Cu* and *rac-poly\_3c\_Ag\_RR* and *rac-poly\_3c\_Ag\_SS* were measured with an STADIVARI diffractometer from STOE equipped with an EGER 1M CDTE detector and AXO\_Mo sources providing  $K\alpha$  radiation by high-grade multilayer X-ray mirror optics for Mo ( $\lambda = 0.71073 \text{ \AA}$ ) wavelengths. The measurements were carried out at 120 K. The structures of the compounds were solved by direct methods and refined against  $F^2$  with the Shelxs-2008 and Shelxl-2008 programs<sup>2</sup> run under WinGX.<sup>3</sup> Non-hydrogen atoms were refined with anisotropic displacement parameters. The isotropic displacement parameters of all hydrogens were fixed to 1.2  $U_{eq}$  for aromatic, CH, CH<sub>2</sub> (1.5 times for methyl) groups.

The crystallographic data for all structures reported in this paper have been deposited in the Cambridge Crystallographic Data Centre as supplementary publication No. CCDC 2307097-2307103. Copies of the data can be obtained free of charge upon application to the CCDC, 12 Union Road, Cambridge CB2 1EZ, UK (Fax: (+44) 1223-336-033; E mail: deposit@ccdc.cam.ac.uk).

**Table S1.** Crystallographic data for **3a** and **3c**.

|                                                  | <b>3a</b>                                                       | <b>3c</b>                                                         |
|--------------------------------------------------|-----------------------------------------------------------------|-------------------------------------------------------------------|
| Empirical formula                                | C <sub>46</sub> H <sub>66</sub> P <sub>4</sub> S <sub>2</sub>   | C <sub>57</sub> H <sub>75</sub> P <sub>4</sub> S <sub>2</sub>     |
| Formula weight                                   | 806.98                                                          | 947.16                                                            |
| Radiation source                                 | Cu-K $\alpha$                                                   | Mo-K $\alpha$                                                     |
| Wavelength [Å]                                   | 1.54186                                                         | 0.71073                                                           |
| Crystal System                                   | Triclinic                                                       | Triclinic                                                         |
| Space group                                      | <i>P</i> -1                                                     | <i>P</i> -1                                                       |
| <i>a</i> [Å]                                     | 8.4421(4)                                                       | 9.6607(4)                                                         |
| <i>b</i> [Å]                                     | 9.3290(4)                                                       | 17.1058(7)                                                        |
| <i>c</i> [Å]                                     | 16.0163(7)                                                      | 17.4524(7)                                                        |
| $\alpha$ [°]                                     | 80.560(3)                                                       | 105.193(3)                                                        |
| $\beta$ [°]                                      | 88.671(4)                                                       | 94.859(3)                                                         |
| $\gamma$ [°]                                     | 66.536(3)                                                       | 101.727(3)                                                        |
| <i>V</i> [Å <sup>3</sup> ]                       | 1140.18(9)                                                      | 2696.0(2)                                                         |
| <i>Z</i>                                         | 1                                                               | 2                                                                 |
| Calculated Density [g·cm <sup>-1</sup> ]         | 1.175                                                           | 1.167                                                             |
| <i>T</i> [K]                                     | 120(2)                                                          | 120(2)                                                            |
| $\mu$ [mm <sup>-1</sup> ]                        | 2.599                                                           | 0.253                                                             |
| Theta range for data collection [°]              | 2.80-67.90                                                      | 2.18-29.72                                                        |
| Index ranges                                     | -8 ≤ <i>h</i> ≤ 8<br>-10 ≤ <i>k</i> ≤ 10<br>-18 ≤ <i>l</i> ≤ 18 | -11 ≤ <i>h</i> ≤ 13<br>-23 ≤ <i>k</i> ≤ 23<br>-22 ≤ <i>l</i> ≤ 23 |
| Data / restraints / parameters                   | 3721/0/241                                                      | 14459/0/585                                                       |
| Goodness-of-fit on <i>F</i> <sup>2</sup>         | 1.047                                                           | 1.065                                                             |
| Final R indices                                  | 0.031                                                           | 0.0702                                                            |
| [ <i>I</i> > 2 $\sigma$ ( <i>I</i> )]            | 0.0348                                                          | 0.1126                                                            |
| R indices (all data)                             | 0.0792                                                          | 0.1126                                                            |
| [ <i>I</i> > 2 $\sigma$ ( <i>I</i> )] (all data) | 0.0825                                                          | 0.1742                                                            |
| Largest diff. peak and hole [e.Å <sup>-3</sup> ] | 0.242 and -0.283                                                | 0.679 and -0.475                                                  |
| <b>CCDC</b>                                      | <b>2307103</b>                                                  | <b>2307101</b>                                                    |

**Table S2.** Crystallographic data for *rac*-poly\_3a\_Cu, *meso*-poly\_3a\_Ag and *rac*-poly\_3c\_Cu.

|                                                  | <i>rac</i> -poly_3a_Cu                                            | <i>meso</i> -poly_3a_Ag                                           | <i>rac</i> -poly_3c_Cu                                            |
|--------------------------------------------------|-------------------------------------------------------------------|-------------------------------------------------------------------|-------------------------------------------------------------------|
| Empirical formula                                | C <sub>23</sub> H <sub>32</sub> ClCuP <sub>2</sub> S              | C <sub>23</sub> H <sub>33</sub> AgClP <sub>2</sub> S              | C <sub>25</sub> H <sub>33</sub> ClCuP <sub>2</sub> S              |
| Formula weight                                   | 502.48                                                            | 546.81                                                            | 526.5                                                             |
| Radiation source                                 | Mo-K $\alpha$                                                     | Cu-K $\alpha$                                                     | Mo-K $\alpha$                                                     |
| Wavelength [Å]                                   | 0.71073                                                           | 1.54186                                                           | 0.71073                                                           |
| Crystal System                                   | Monoclinic                                                        | Triclinic                                                         | Monoclinic                                                        |
| Space group                                      | <i>I</i> 2/a                                                      | <i>P</i> -1                                                       | <i>I</i> 2/a                                                      |
| <i>a</i> [Å]                                     | 17.2149(13)                                                       | 8.6692(4)                                                         | 28.5608(14)                                                       |
| <i>b</i> [Å]                                     | 9.9874(6)                                                         | 9.7343(4)                                                         | 9.7959(4)                                                         |
| <i>c</i> [Å]                                     | 29.208(2)                                                         | 16.9516(8)                                                        | 18.4297(8)                                                        |
| $\alpha$ [°]                                     | 90                                                                | 90.826(4)                                                         | 90                                                                |
| $\beta$ [°]                                      | 105.951(6)                                                        | 103.141(3)                                                        | 99.998(4)                                                         |
| $\gamma$ [°]                                     | 90                                                                | 115.892(3)                                                        | 90                                                                |
| <i>V</i> [Å <sup>3</sup> ]                       | 4828.4(6)                                                         | 1242.62(10)                                                       | 5077.9(4)                                                         |
| <i>Z</i>                                         | 8                                                                 | 2                                                                 | 8                                                                 |
| Calculated Density [g·cm <sup>-3</sup> ]         | 1.382                                                             | 1.462                                                             | 1.377                                                             |
| <i>T</i> [K]                                     | 120(2)                                                            | 120(2)                                                            | 120(2)                                                            |
| $\mu$ [mm <sup>-1</sup> ]                        | 1.242                                                             | 9.538                                                             | 1.184                                                             |
| Theta range for data collection [°]              | 2.61-27.80                                                        | 2.70-67.92                                                        | 2.87- 29.57                                                       |
| Index ranges                                     | -22 ≤ <i>h</i> ≤ 23<br>-13 ≤ <i>k</i> ≤ 13<br>-40 ≤ <i>l</i> ≤ 39 | -10 ≤ <i>h</i> ≤ 10<br>-11 ≤ <i>k</i> ≤ 11<br>-19 ≤ <i>l</i> ≤ 19 | -39 ≤ <i>h</i> ≤ 37<br>-12 ≤ <i>k</i> ≤ 13<br>-22 ≤ <i>l</i> ≤ 24 |
| Data / restraints / parameters                   | 6468/0/288                                                        | 4118/0/259                                                        | 5996/0/277                                                        |
| Goodness-of-fit on <i>F</i> <sup>2</sup>         | 1.039                                                             | 1.089                                                             | 1.025                                                             |
| Final R indices                                  | 0.0767                                                            | 0.0632                                                            | 0.0617                                                            |
| [ <i>I</i> > 2 $\sigma$ ( <i>I</i> )]            | 0.1792                                                            | 0.1693                                                            | 0.1444                                                            |
| R indices (all data)                             | 0.1818                                                            | 0.0668                                                            | 0.1234                                                            |
| [ <i>I</i> > 2 $\sigma$ ( <i>I</i> )] (all data) | 0.2257                                                            | 0.173                                                             | 0.1695                                                            |
| Largest diff. peak and hole [e.Å <sup>-3</sup> ] | 0.111 and -1.059                                                  | 0.15 and -1.677                                                   | 0.124 and -0.697                                                  |
| <b>CCDC</b>                                      | <b>2307099</b>                                                    | <b>2307098</b>                                                    | <b>2307097</b>                                                    |

**Table S3.** Crystallographic data for *rac-poly\_3c\_Ag\_RR* and *rac-poly\_3c\_Ag\_SS*.

|                                                  | <i>rac-poly_3c_Ag_RR</i>                                          | <i>rac-poly_3c_Ag_SS</i>                                          |
|--------------------------------------------------|-------------------------------------------------------------------|-------------------------------------------------------------------|
| Empirical formula                                | C <sub>25</sub> H <sub>33</sub> AgClP <sub>2</sub> S              | C <sub>25</sub> H <sub>33</sub> AgClP <sub>2</sub> S              |
| Formula weight                                   | 570.83                                                            | 570.83                                                            |
| Radiation source                                 | Mo-K $\alpha$                                                     | Mo-K $\alpha$                                                     |
| Wavelength [Å]                                   | 0.71073                                                           | 0.71073                                                           |
| Crystal System                                   | Monoclinic                                                        | Monoclinic                                                        |
| Space group                                      | <i>I</i> 2/a                                                      | <i>I</i> 2/a                                                      |
| <i>a</i> [Å]                                     | 29.1911(18)                                                       | 29.324(3)                                                         |
| <i>b</i> [Å]                                     | 9.7656(4)                                                         | 9.7516(6)                                                         |
| <i>c</i> [Å]                                     | 18.4336(12)                                                       | 18.3994(14)                                                       |
| $\alpha$ [°]                                     | 90                                                                | 90                                                                |
| $\beta$ [°]                                      | 98.632(5)                                                         | 98.631(7)                                                         |
| $\gamma$ [°]                                     | 90                                                                | 90                                                                |
| <i>V</i> [Å <sup>3</sup> ]                       | 5195.3(5)                                                         | 6750                                                              |
| <i>Z</i>                                         | 8                                                                 | 8                                                                 |
| Calculated Density [g·cm <sup>-1</sup> ]         | 1.46                                                              | 1.458                                                             |
| <i>T</i> [K]                                     | 150(2)                                                            | 120(2)                                                            |
| $\mu$ [mm <sup>-1</sup> ]                        | 1.093                                                             | 1.092                                                             |
| Theta range for data collection [°]              | 3.06-29.70                                                        | 2.84-26.12                                                        |
| Index ranges                                     | -38 ≤ <i>h</i> ≤ 36<br>-10 ≤ <i>k</i> ≤ 12<br>-22 ≤ <i>l</i> ≤ 25 | -37 ≤ <i>h</i> ≤ 38<br>-10 ≤ <i>k</i> ≤ 13<br>-25 ≤ <i>l</i> ≤ 23 |
| Data / restraints / parameters                   | 5668/0/277                                                        | 6290/0/277                                                        |
| Goodness-of-fit on <i>F</i> <sup>2</sup>         | 1.032                                                             | 1.006                                                             |
| Final R indices                                  | 0.0644                                                            | 0.0743                                                            |
| [ <i>I</i> > 2 $\sigma$ ( <i>I</i> )]            | 0.1567                                                            | 0.1436                                                            |
| R indices (all data)                             | 0.1439                                                            | 0.2291                                                            |
| [ <i>I</i> > 2 $\sigma$ ( <i>I</i> )] (all data) | 0.193                                                             | 0.1964                                                            |
| Largest diff. peak and hole [e.Å <sup>-3</sup> ] | 0.148 and -1.099                                                  | 0.137 and -0.906                                                  |
| <b>CCDC</b>                                      | <b>2307100</b>                                                    | <b>2307102</b>                                                    |

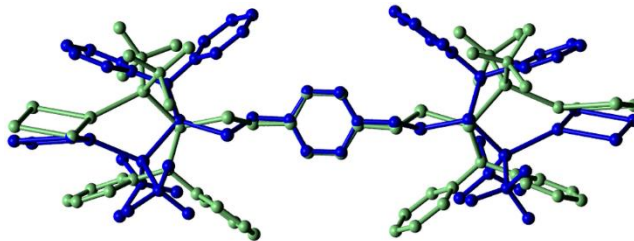

**Figure S31.** Overlay of the two basic units of the polymer *rac*-poly\_3c\_Ag (blue: *RR* configuration, mint: *SS* configuration).

### PART C. TG and DSC spectra

Thermogravimetric analysis (TG) was carried out under argon atmosphere with a flow rate of 60 ml/min in the temperature range 35–800 °C (heating rate 5°C/min) using STA 449 F1 (Netzsch). The differential scanning calorimetry (DSC) measurement was performed under an argon atmosphere with a flow rate 60 mL min/1 in the temperature range of 35–600 °C (with a heating rate of 10 °C min<sup>-1</sup>) using a NETZSCH DSC 204 F1 Phoenix calorimeter. A constant sample mass of 2±0.5 mg was maintained throughout the TG and DSC analysis.

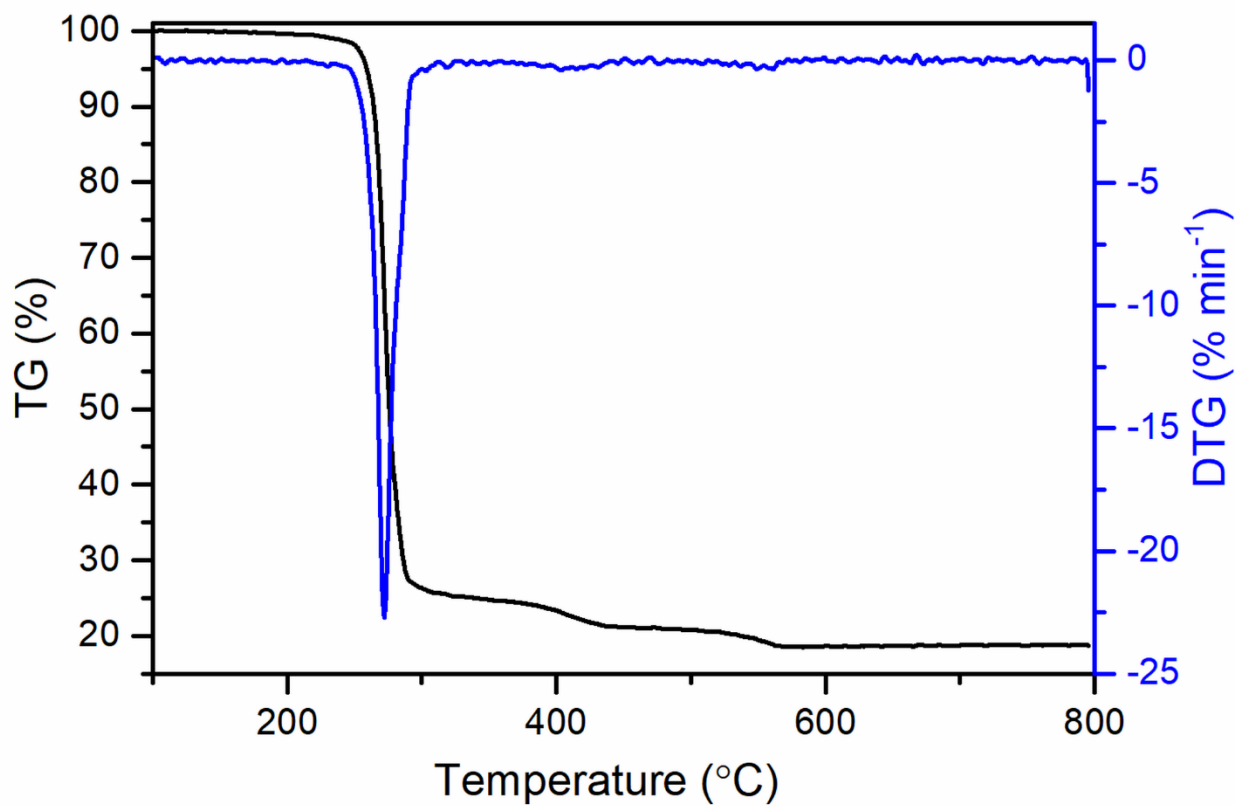

**Figure S32.** TG-DTG curve of the *rac*-poly\_3a\_Cu in a temperature range from 35°C to 300°C with a heating rate of 5°Cmin<sup>-1</sup> (the black lines represent the TG curves, while the blue lines represent the first derivatives of the TG curves – DTG).

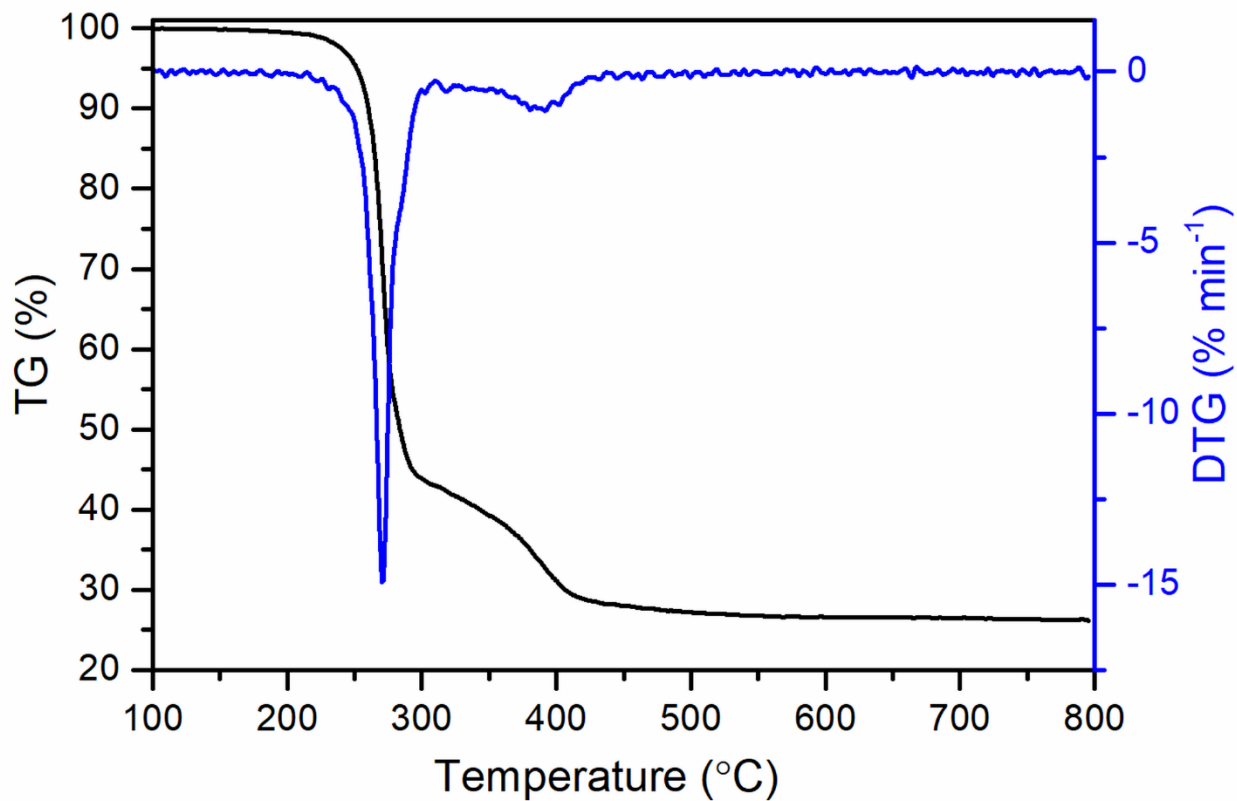

**Figure S33.** TG-DTG curve of the *rac*-poly\_3c\_Cu in a temperature range from 35°C to 300°C with a heating rate of 5°Cmin<sup>-1</sup>(the black lines represent the TG curves, while the blue lines represent the first derivatives of the TG curves – DTG).

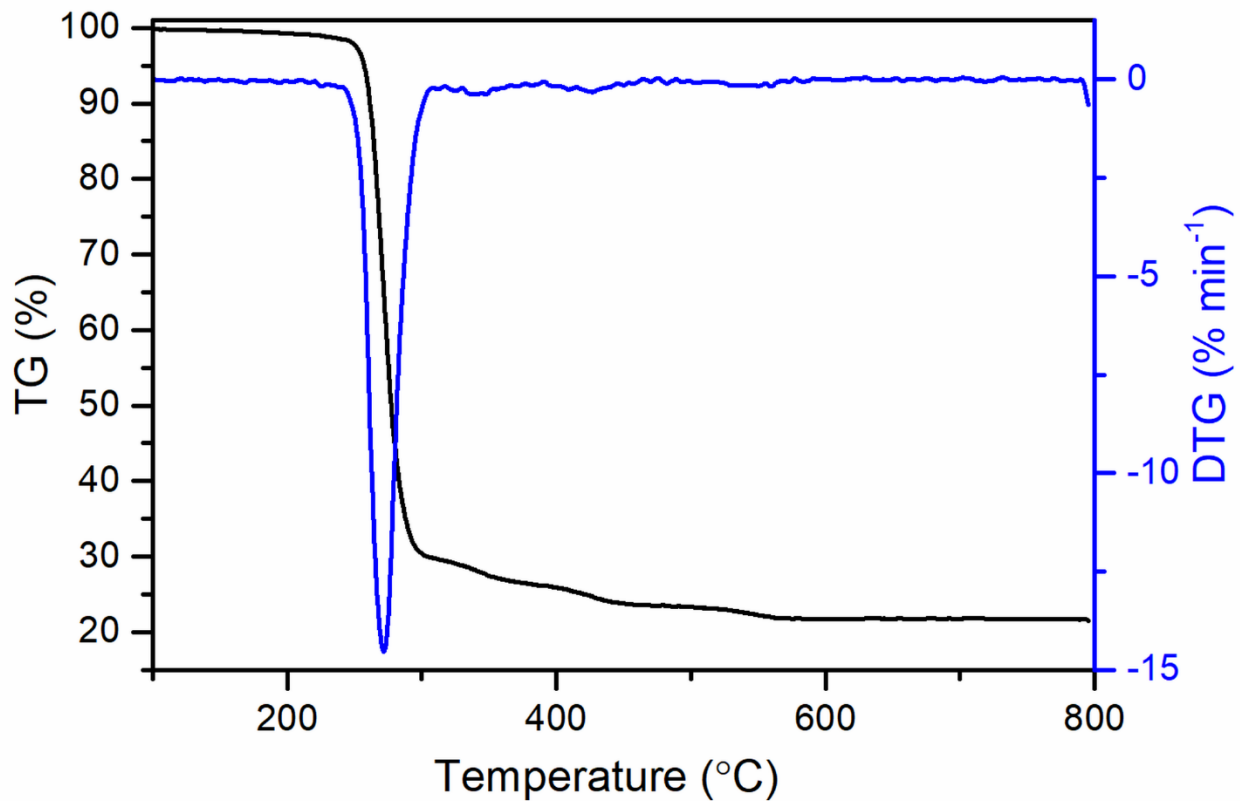

**Figure S34.** TG-DTG curve of the *meso-poly\_3a\_Ag* in a temperature range from 35°C to 300°C with a heating rate of 5°Cmin<sup>-1</sup>(the black lines represent the TG curves, while the blue lines represent the first derivatives of the TG curves – DTG)



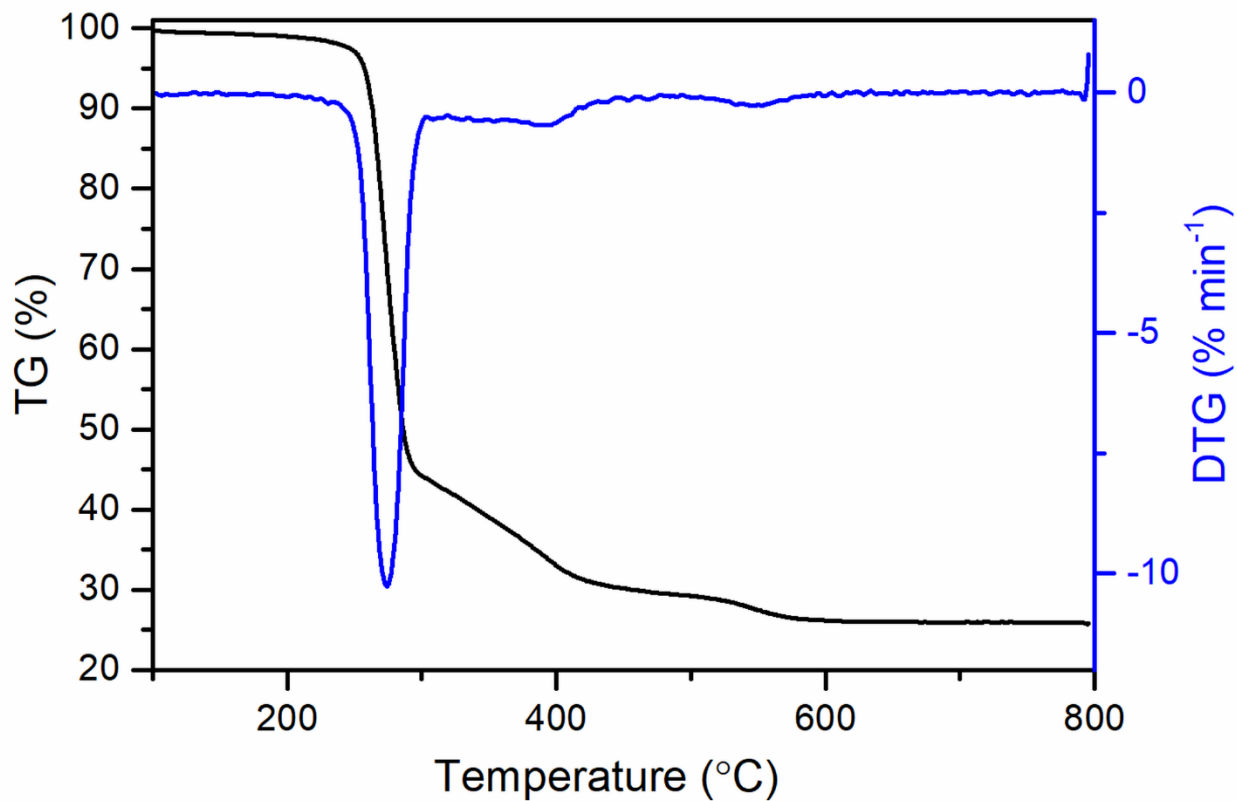

**Figure S35.** TG-DTG curve of the *rac*-poly\_3c\_Ag in a temperature range from 35°C to 300°C with a heating rate of 5°Cmin<sup>-1</sup>(the black lines represent the TG curves, while the blue lines represent the first derivatives of the TG curves – DTG).

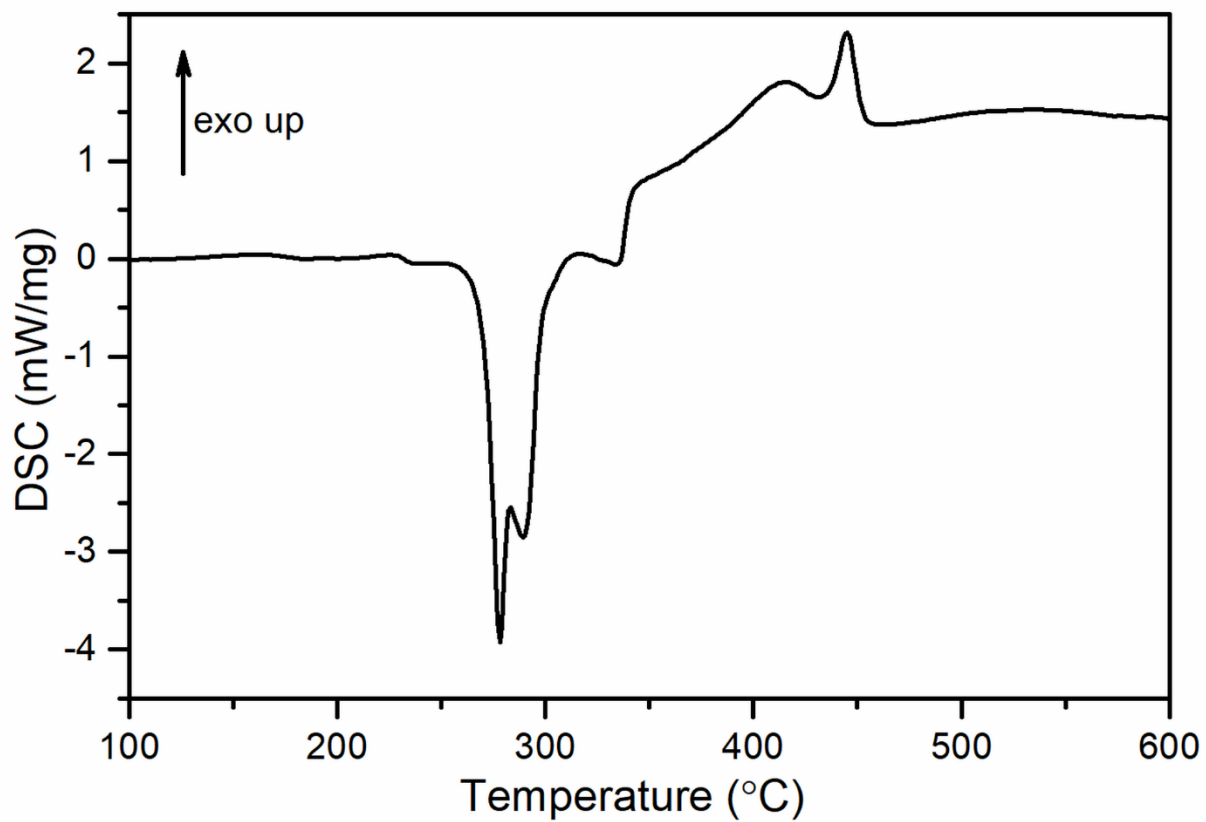

**Figure S36.** DSC curve of the *rac*-poly\_3a\_Cu in a temperature range from 35°C to 600°C with a heating rate of 10°Cmin<sup>-1</sup>.

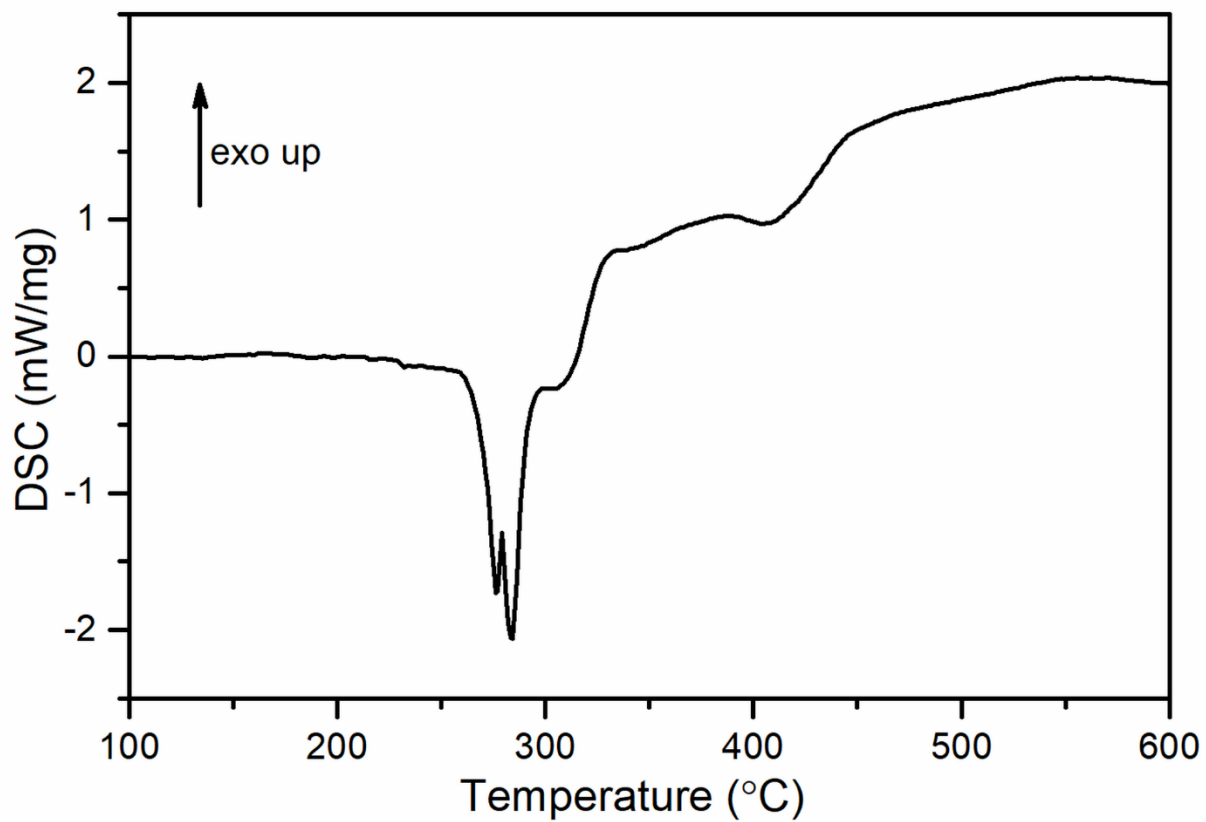

**Figure S37.** DSC curve of the *rac*-poly\_3c\_Cu in a temperature range from 35°C to 600°C with a heating rate of 10°Cmin<sup>-1</sup>.

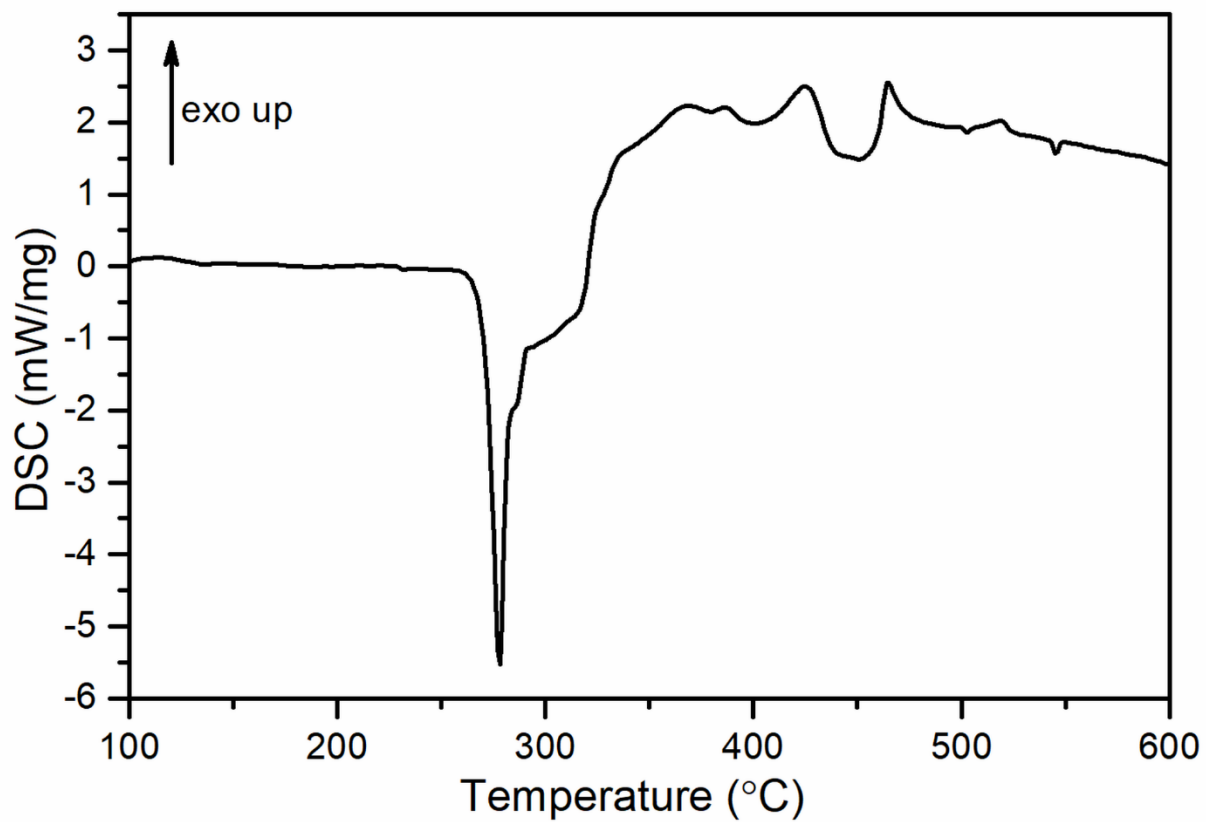

**Figure S38.** DSC curve of the *meso-poly\_3a\_Ag* in a temperature range from 35°C to 600°C with a heating rate of 10°Cmin<sup>-1</sup>.

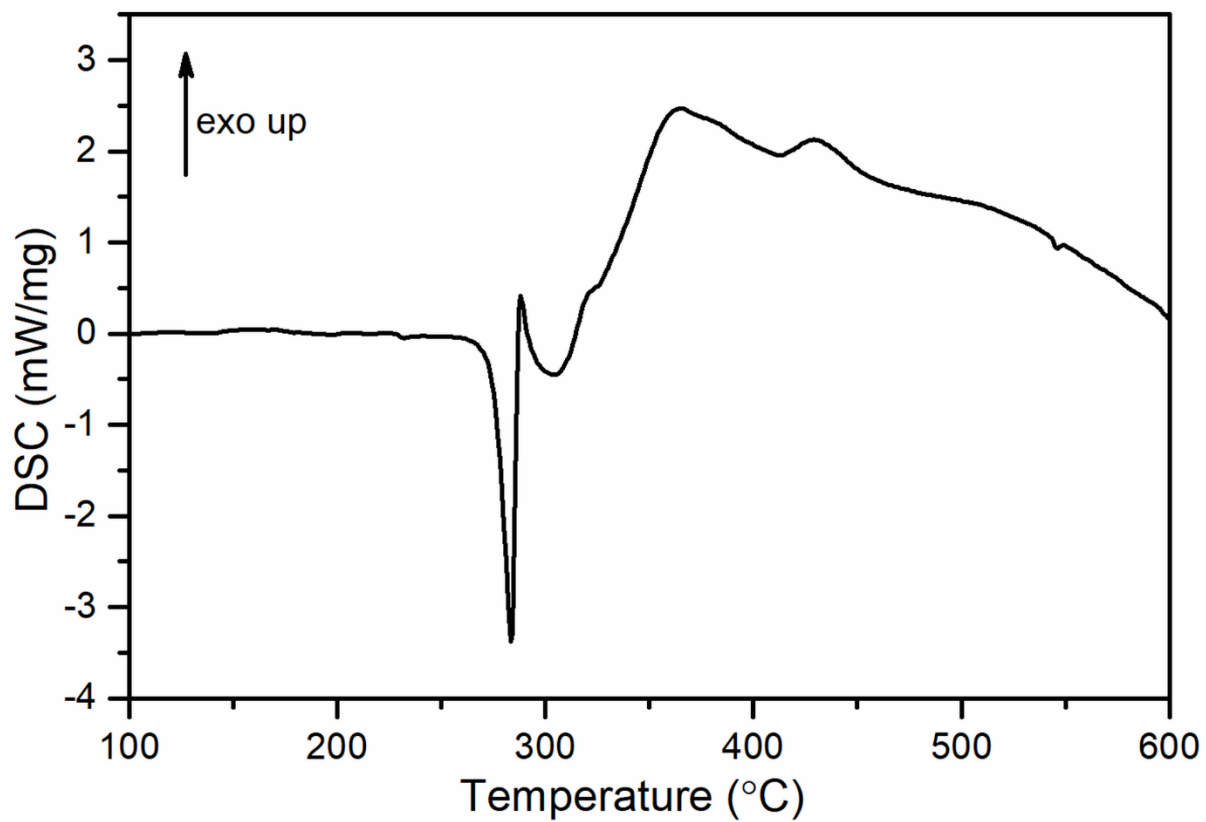

**Figure S39.** DSC curve of the *rac*-poly\_3c\_Ag in a temperature range from 35°C to 600°C with a heating rate of 10°Cmin<sup>-1</sup>.

## **PART D. References**

- (1) Ziółkowska, A.; Szykiewicz, N.; Ryl, J.; Ponikiewski, Ł. Group 11 complexes with a phosphanylphosphaalkene ligand: preparation and stability study. *Dalton Trans.* **2023**, 52 (15), 4658-4662.
- (2) Sheldrick, G. A short history of SHELX. *Acta Crystallogr. A* **2008**, 64 (1), 112-122.
- (3) Farrugia, L. WinGX and ORTEP for Windows: an update. *J. Appl. Cryst.* **2012**, 45 (4), 849-854.
